# Novel Inhibitors of Mitochondrial *sn*-Glycerol 3-phosphate Dehydrogenase

Adam L. Orr, Deepthi Ashok, Melissa R. Sarantos, Ryan Ng, Tong Shi<sup>‡</sup>, Akos A. Gerencser, Robert E. Hughes, Martin D. Brand\*

Buck Institute for Research on Aging, Novato, California, United States of America

## Abstract

Mitochondrial *sn*-glycerol 3-phosphate dehydrogenase (mGPDH) is a ubiquinone-linked enzyme in the mitochondrial inner membrane best characterized as part of the glycerol phosphate shuttle that transfers reducing equivalents from cytosolic NADH into the mitochondrial electron transport chain. Despite the widespread expression of mGPDH and the availability of mGPDH-null mice, the physiological role of this enzyme remains poorly defined in many tissues, likely because of compensatory pathways for cytosolic regeneration of NAD<sup>+</sup> and mechanisms for glycerol phosphate metabolism. Here we describe a novel class of cell-permeant small-molecule inhibitors of mGPDH (iGP) discovered through small-molecule screening. Structure-activity analysis identified a core benzimidazole-phenyl-succinamide structure as being essential to inhibition of mGPDH while modifications to the benzimidazole ring system modulated both potency and off-target effects. Live-cell imaging provided evidence that iGPs penetrate cellular membranes. Two compounds (iGP-1 and iGP-5) were characterized further to determine potency and selectivity and found to be mixed inhibitors with IC<sub>50</sub> and K<sub>i</sub> values between ~1–15 μM. These novel mGPDH inhibitors are unique tools to investigate the role of glycerol 3-phosphate metabolism in both isolated and intact systems.

**Citation:** Orr AL, Ashok D, Sarantos MR, Ng R, Shi T, et al. (2014) Novel Inhibitors of Mitochondrial *sn*-Glycerol 3-phosphate Dehydrogenase. PLoS ONE 9(2): e89938. doi:10.1371/journal.pone.0089938

**Editor:** Vasu D. Appanna, Laurentian University, Canada

**Received:** November 25, 2013; **Accepted:** January 28, 2014; **Published:** February 24, 2014

**Copyright:** © 2014 Orr et al. This is an open-access article distributed under the terms of the Creative Commons Attribution License, which permits unrestricted use, distribution, and reproduction in any medium, provided the original author and source are credited.

**Funding:** This work was supported by National Institutes of Health grants R01 AG033542 (MDB), RL1 GM084432 (REH), and TL 1 AG032116 (ALO) as well as The Ellison Medical Foundation grant AG-SS-2288-09 (MDB). The funders had no role in study design, data collection and analysis, decision to publish, or preparation of the manuscript.

**Competing Interests:** The authors have declared that no competing interests exist.

\* E-mail: mbrand@buckinstitute.org

<sup>‡</sup> Current address: Evotec, South San Francisco, California, United States of America

## Introduction

Mitochondrial *sn*-glycerol 3-phosphate dehydrogenase (mGPDH<sup>3</sup>; EC 1.1.5.3; gene symbol *GPD2*) is an important link between cytosolic and mitochondrial energy transduction. mGPDH is a ubiquinone-linked flavoprotein embedded in the outer leaflet of the mitochondrial inner membrane that transfers reducing equivalents directly from glycerol 3-phosphate into the electron transport chain [1,2]. Glycerol 3-phosphate is an intermediate common to both lipid and carbohydrate metabolism. Its oxidation to dihydroxyacetone phosphate (DHAP) by mGPDH and the subsequent reduction of DHAP back to glycerol 3-phosphate by a distinct soluble GPDH (cytosolic GPDH; cGPDH; EC 1.1.1.8; gene symbol *GPD1*) regenerates NAD<sup>+</sup> consumed during glycolysis (Fig. 1A). This cyclic process of transferring reducing equivalents from cytosolic NADH into the mitochondrial respiratory chain is known as the glycerol phosphate shuttle. Along with the malate-aspartate shuttle (Fig. 1B) and production of lactate by lactate dehydrogenase (Fig. 1C), it is a common mechanism by which cytosolic NAD<sup>+</sup> is regenerated to facilitate glycolytic activity in a variety of cell types [3].

The active site of mGPDH faces the mitochondrial intermembrane space, as does its calcium-sensitive EF-hand domain that lowers the K<sub>m</sub> for glycerol 3-phosphate as physiological levels of free calcium rise [1,2,4,5]. This orientation is thought to allow

mGPDH to coordinate cytosolic and mitochondrial metabolism during periods of high activity and, not surprisingly, mGPDH is expressed most highly in tissues with variable energy demands including thermogenic brown fat, type II skeletal muscle fibers, brain, sperm and pancreatic β-cells [6,7]. Further, mGPDH expression is hormonally regulated to alter tissue activity both during development and in response to environmental challenges [8–10]. Despite the widespread expression of the enzyme, mGPDH-knockout mice display relatively mild phenotypes beyond weaning. These include decreased body mass and decreased white fat mass. However food intake, non-white fat tissues, and metabolic profiles are normal in these mice [11]. Prior to weaning, viability of mGPDH-null pups is decreased by 50%. Such a dramatic developmental bottleneck raises the possibility that the absence of mGPDH in surviving adults may be successfully compensated for by parallel metabolic pathways. In fact, further roles for mGPDH have only been observed after additional genetic, pharmacologic, or environmental manipulations. For example, ablation of cGPDH as well as mGPDH prevents compensatory responses in glycerol 3-phosphate metabolism, causes dramatic changes in metabolic profiles, and is lethal within one week of birth [12].

An alternative strategy to genetic manipulation of enzyme expression is the acute use of selective inhibitors. Several groups have demonstrated inhibition of mGPDH or bacterial GPDH by

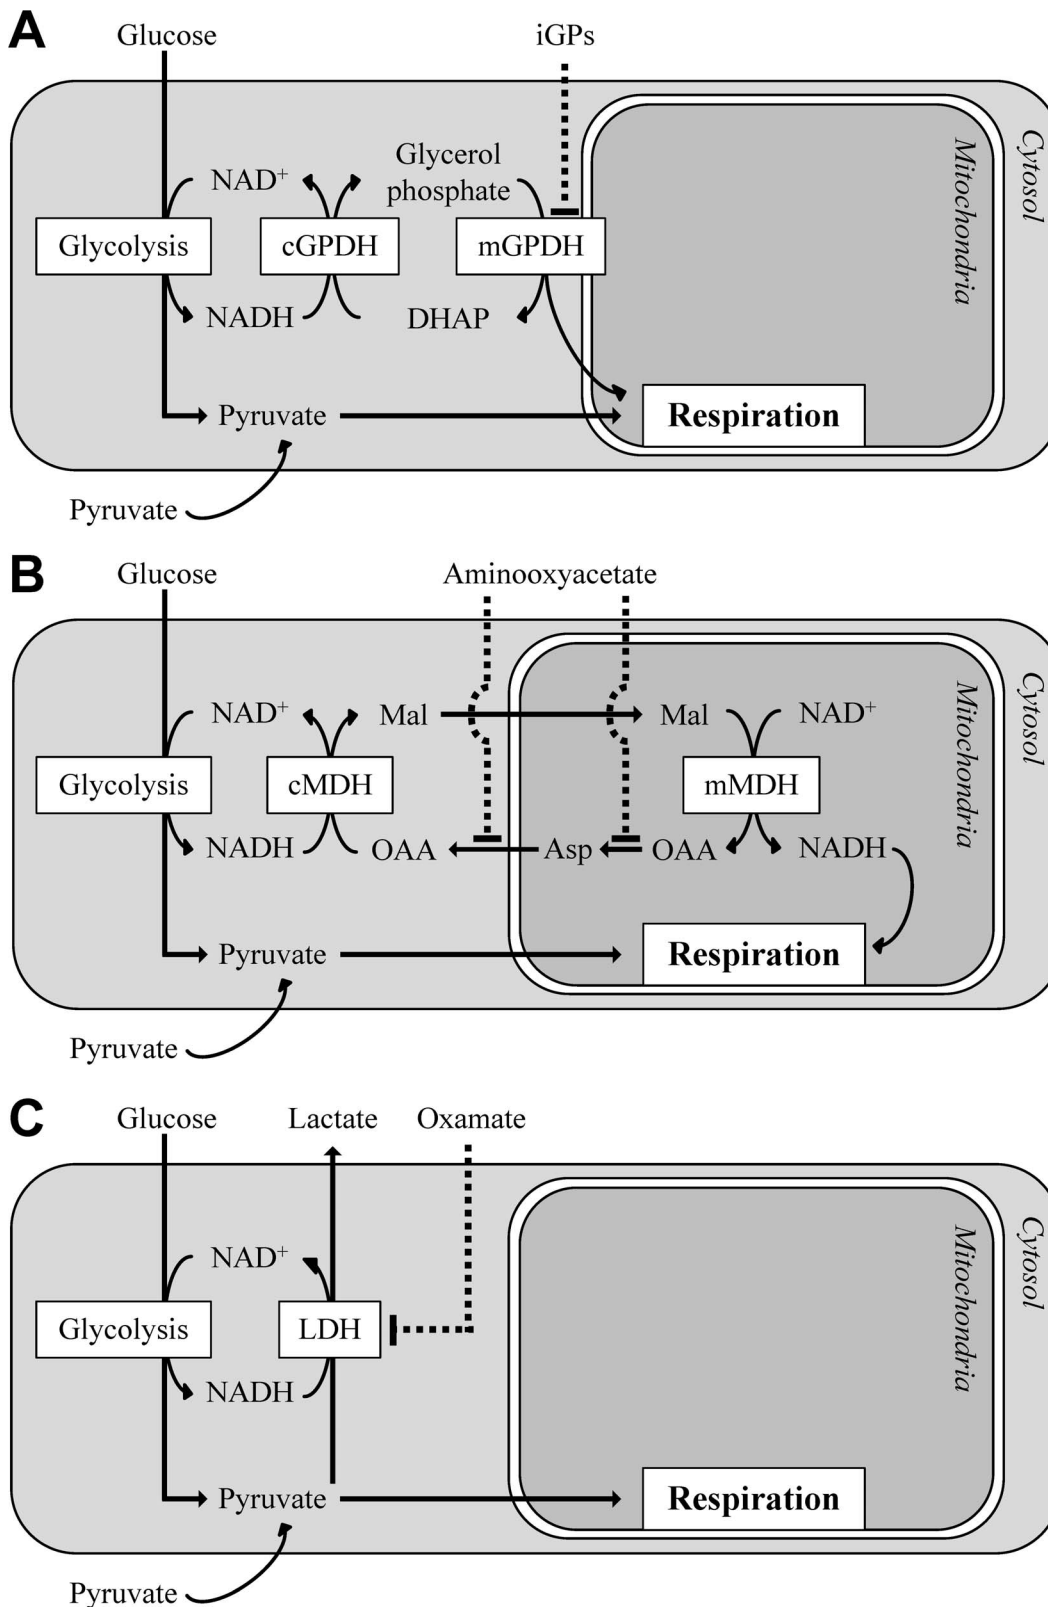

**Figure 1. The glycerol phosphate shuttle is one of several pathways to regenerate cytosolic  $NAD^+$  for glycolysis.** Glycolytic metabolism of glucose to pyruvate involves the reduction of cytosolic  $NAD^+$  to  $NADH$  at the step catalyzed by glyceraldehyde 3-phosphate dehydrogenase. Several mechanisms exist to regenerate cytosolic  $NAD^+$  to ensure that a high  $NADH/NAD^+$  ratio does not limit glucose metabolism. **(A)** The glycerol phosphate shuttle comprises soluble,  $NAD^+$ -linked cGPDH and the membrane bound, FAD-linked mGPDH. This system regenerates cytosolic  $NAD^+$  and transfers the reducing equivalents directly into the mobile ubiquinone pool of the mitochondrial electron transport chain. **(B)** The malate-aspartate shuttle comprises multiple enzymes and mitochondrial carriers that interconvert and transport dicarboxylates and amino acids. In the

cytosol, malate dehydrogenase regenerates  $\text{NAD}^+$  during reduction of oxaloacetate to malate. This malate is transported into the mitochondrial matrix where it is oxidized back to oxaloacetate by mitochondrial malate dehydrogenase, producing NADH that is reoxidized by complex I of the electron transport chain. To complete the shuttle, cytosolic oxaloacetate is regenerated by sequential transaminations through aspartate. These transaminations are potentially inhibited by aminooxyacetate. *cMDH*, cytosolic malate dehydrogenase; *mMDH*, mitochondrial malate dehydrogenase; *OAA*, oxaloacetate; *Mal*, malate; *Asp*, aspartate (C) Lactate dehydrogenase regenerates cytosolic  $\text{NAD}^+$  at the expense of mitochondrial oxidation of pyruvate. *LDH*, lactate dehydrogenase. In certain systems, such as neuronal synapses, the maintenance of cytosolic  $\text{NAD}^+$  by each of these mechanisms can be made less important by direct uptake and oxidation of pyruvate.  
doi:10.1371/journal.pone.0089938.g001

various small metabolite analogs of glycerol 3-phosphate [2,13–15]. These analogs, the most potent being the glycolytic intermediate glyceraldehyde 3-phosphate, act by competitive inhibition in the substrate-binding pocket [2]. DHAP is both a glycolytic intermediate and product of mGPDH. Whereas  $\text{NAD}^+$ -linked cGPDH can interconvert DHAP and glycerol 3-phosphate, the ubiquinone-linked reaction catalyzed by mGPDH is irreversible and displays product inhibition by DHAP [2]. Additionally, lipid metabolites such as free fatty acids and acyl CoAs, inorganic ions such as sulfate and phosphate, and several heavy metal ions also inhibit FAD-linked GPDH activity [2,15–17]. Importantly, many of these are not cell-permeable and none is selective for mGPDH. Other proposed small-molecule inhibitors of mGPDH activity such as polyborates, indomethacin, doxorubicin, or diazoxide are also not selective [6,18–23]. Therefore, a need remains for selective and cell-permeant inhibitors of mGPDH to elucidate the role of this widely-expressed enzyme under appropriate physiological conditions [3,24]. Here we describe the identification and characterization of a novel class of small-molecule inhibitors of mGPDH activity (iGP) that are cell-permeant, potent, and highly selective for mGPDH.

## Materials and Methods

### Reagents

$\text{CaCl}_2$  standard was from Thermo Scientific, fatty acid-free BSA from Calbiochem, and atpenin A5 from Santa Cruz Biotechnology. Amplex UltraRed, tetramethylrhodamine methyl ester (TMRM), LysoTracker Red DND-99, and Geltrex were from Invitrogen. Compounds for screening were arbitrarily selected from a diverse, non-combinatorial library obtained from ChemBridge (~10 mM in DMSO). New stocks of primary hits and their structural analogs were also sourced from ChemBridge (and dissolved to 80 mM in DMSO). The biological activity of iGP-1 (ChemBridge ID 5224148) was validated using compound obtained from Vitas-M (ID STK017597) and found to be essentially identical. All other reagents were from Sigma-Aldrich. *sn*-Glycerol 3-phosphate was added as disodium *rac*- $\alpha$ - $\beta$ -glycerol phosphate (25% active optical isomer *sn*-glycerol 3-phosphate, 25% inactive optical isomer *sn*-glycerol 1-phosphate and 50% inactive structural isomer glycerol 2-phosphate) and will be referred to as glycerol phosphate. Where indicated, total and free calcium concentrations in assay buffers were calculated using the Extended MaxChelator program available through Chris Patton on the Stanford University Web site at <http://maxchelator.stanford.edu>.

### Animals

Skeletal muscle mitochondria were isolated from hindlimbs of 5–8 week old female Wistar rats (Harlan Laboratories) as previously described [25]. Cortical synaptosomes were isolated from 6–12 week old male C57BL/6 mice (Jackson Labs) as previously described [26]. The animal protocol was approved by the Buck Institute Animal Care and Use Committee, in accordance with IACUC standards.

### Measurement of Mitochondrial $\text{H}_2\text{O}_2$ Production and Membrane Potential

Superoxide was measured as  $\text{H}_2\text{O}_2$  after dismutation by endogenous or exogenous superoxide dismutase. Rates of total superoxide/ $\text{H}_2\text{O}_2$  production were measured fluorimetrically using Amplex UltraRed in the presence of exogenous superoxide dismutase and horseradish peroxidase in a Varian Cary Eclipse fluorimeter as previously described [27]. Rates of production from specific sites were determined as previously described using the following eight conditions: flavin mononucleotide site of complex I (site  $\text{I}_F$ ) plus matrix NAD-linked dehydrogenases (collectively "site  $\text{I}_F/\text{DH}^m$ ") with 5 mM glutamate, 5 mM malate, and 4  $\mu\text{M}$  rotenone [28]; ubiquinone-binding site of complex I (site  $\text{I}_Q$ ) with either 0.5 or 5 mM succinate [29]; flavin site of complex II (site  $\text{II}_F$ ) with either 15  $\mu\text{M}$  palmitoylcarnitine, 2.5  $\mu\text{M}$  antimycin A, and 2  $\mu\text{M}$  myxothiazol or 0.5 mM succinate, 4  $\mu\text{M}$  rotenone, 2.5  $\mu\text{M}$  antimycin A, and 2  $\mu\text{M}$  myxothiazol [30,31]; mGPDH with 1.7 mM glycerol phosphate, 4  $\mu\text{M}$  rotenone, 2.5  $\mu\text{M}$  antimycin A, 2  $\mu\text{M}$  myxothiazol, 1 mM malonate, and 250 nM free calcium; outer ubiquinone-binding site of complex III (site  $\text{III}_{Qo}$ ) with either 0.5 or 5 mM succinate, 4  $\mu\text{M}$  rotenone and 2.5  $\mu\text{M}$  antimycin A [32]. Candidate small-molecule inhibitors were added prior to the start of measurements and  $\text{H}_2\text{O}_2$  calibration curves were performed in the presence of tested compounds.

Mitochondrial membrane potential ( $\Delta\Psi_m$ ) was estimated fluorimetrically as described previously [33] on the Varian fluorimeter, except the potentiometric dye TMRM was used in quench-mode in place of safranin O [34]. Briefly, skeletal muscle mitochondria (0.2 mg protein  $\cdot$  mL $^{-1}$ ) were incubated with 5  $\mu\text{M}$  TMRM in the presence of inhibitors or vehicle.  $\Delta\Psi_m$  was generated by sequential addition of substrates of complex I (5 mM glutamate plus 5 mM malate), complex II (4  $\mu\text{M}$  rotenone then 0.5 or 5 mM succinate), and mGPDH (2  $\mu\text{M}$  atpenin A5 then 1.7 or 16.7 mM glycerol phosphate). The effect of putative small-molecule inhibitors was normalized as the % change in fluorescence between vehicle treatment and complete depolarization by the uncoupler carbonyl cyanide-4-(trifluoromethoxy)phenylhydrazone (FCCP, 2  $\mu\text{M}$ ) added at the end of each run. When indicated, the  $\text{K}^+/\text{H}^+$  exchanger nigericin (80 ng  $\cdot$  mL $^{-1}$ ) was added to collapse the pH gradient across the mitochondrial inner membrane ( $\Delta\text{pH}$ ) and maximize  $\Delta\Psi_m$ .

The assay buffer for both  $\text{H}_2\text{O}_2$  and  $\Delta\Psi_m$  measurements was 120 mM KCl, 5 mM HEPES, 1 mM EGTA, 0.3% (w/v) BSA without or with 250 nM free calcium at pH 7.0. All assays were performed with stirring at 37°C.

### Measurement of iGP-1 Fluorescence in Solution

Excitation and emission spectra of iGP-1 fluorescence were acquired with the Varian fluorimeter in standard buffer with pH adjusted to between 1.5 and 11 as indicated.

### Screening for Inhibitors of $\text{H}_2\text{O}_2$ Production by mGPDH

3,200 compounds were tested initially at 2.5  $\mu\text{M}$  (0.025% DMSO final) in duplicate on different plates against a panel of five

distinct assays of site-specific superoxide/ $\text{H}_2\text{O}_2$  production as described in the previous section with minor changes. Targeted sites included site  $\text{I}_F/\text{DH}$  with 5 mM glutamate, 5 mM malate, and 4  $\mu\text{M}$  rotenone, site  $\text{I}_Q$  with 5 mM succinate, site  $\text{II}_F$  with 15  $\mu\text{M}$  palmitoylcarnitine, 2.5  $\mu\text{M}$  antimycin A, and 2  $\mu\text{M}$  myxothiazol, mGPDH with 16.7 mM glycerol phosphate, 4  $\mu\text{M}$  rotenone, 2.5  $\mu\text{M}$  antimycin A, 2  $\mu\text{M}$  myxothiazol, 1 mM malonate, and no added calcium, and site  $\text{III}_{Q_0}$  with 5 mM succinate, 4  $\mu\text{M}$  rotenone and 2.5  $\mu\text{M}$  antimycin A. Compounds and assay components were distributed by a Biomek FX liquid handling workstation (Beckman) into 96-well black plates (Nunc) to a final volume of 200  $\mu\text{L}$ , and incubated in the dark at room temperature for 30–40 min after the addition of substrate. Endpoint fluorescence was measured on a Perkin Elmer Victor V3 fluorescent plate reader. The fluorescence intensity of each well was normalized as % change from the average of eight DMSO controls on the same plate. Duplicate wells of each of four modulators of mitochondrial metabolism known to inhibit specific sites of superoxide/ $\text{H}_2\text{O}_2$  production were included on each plate as positive controls and the resulting fluorescence levels set as  $-100\%$  change from DMSO controls. Known inhibitors included 20 mM aspartate (for site  $\text{I}_F/\text{DH}$ ), 1  $\mu\text{M}$  FCCP (for site  $\text{I}_Q$ ), 10 mM malonate (for site  $\text{II}_F$ ), and 2  $\mu\text{M}$  myxothiazol (for site  $\text{III}_{Q_0}$ ). The background fluorescence of the FCCP wells in the site  $\text{I}_Q$  assay was used to normalize mGPDH plates run in parallel. To minimize position-dependent effects across each assay plate, Tukey's two-way median polish was applied to fluorescence values after initial normalization [35,36]. Tukey's polish is an iterative subtraction of the median row and column values from each well's given row or column. The procedure is repeated until sequential medians for each row and column are zero and positional gradients in fluorescence are eliminated.

Novel inhibitors of superoxide/ $\text{H}_2\text{O}_2$  production by mGPDH were identified as compounds whose average effect was to decrease  $\text{H}_2\text{O}_2$  production by at least 10% without altering  $\text{H}_2\text{O}_2$  production in other assays by more than  $\pm 10\%$ . Select hits in the mGPDH assay were re-sourced from ChemBridge and retested at 0.08–80  $\mu\text{M}$  (0.1% DMSO final) in duplicate on the same microplate as described above against the eight conditions listed under “Measurement of mitochondrial  $\text{H}_2\text{O}_2$  production and membrane potential.”

### Analysis of Structure/activity Relationships

Structure/activity analysis was performed on 18 structural analogs of two structurally-related hits from the primary screen (iGP-1 and iGP-2). These 20 compounds were tested in duplicate at 0.08–80  $\mu\text{M}$  (0.1% DMSO final) in microplate format for effects on site-specific  $\text{H}_2\text{O}_2$  production as described above. Additionally, four microplate assays for  $\Delta\Psi_m$  were run in parallel to the  $\text{H}_2\text{O}_2$  assays. These assays were as described under “Measurement of mitochondrial  $\text{H}_2\text{O}_2$  production and membrane potential” except that each substrate condition was assayed in a separate microplate. Compounds were tested against the following substrate conditions: 5 mM glutamate and 5 mM malate both without and with 80  $\text{ng} \cdot \text{mL}^{-1}$  nigericin, 5 mM succinate and 4  $\mu\text{M}$  rotenone with 80  $\text{ng} \cdot \text{mL}^{-1}$  nigericin, and 16.7 mM glycerol phosphate and 4  $\mu\text{M}$  rotenone with 80  $\text{ng} \cdot \text{mL}^{-1}$  nigericin. Plates were incubated in the dark at room temperature for 30–40 min ( $\text{H}_2\text{O}_2$ ) or 10–15 min ( $\Delta\Psi_m$ ) after the addition of substrate, and endpoint fluorescence was measured on the Victor plate reader. Endpoints were chosen for the  $\text{H}_2\text{O}_2$  assays to provide good signal-to-noise ratios and linear rates of change without the indicator dye limiting the reaction. Endpoints for the  $\Delta\Psi_m$  assays were determined in pilot experiments as the times for

TMRM accumulation to reach a steady state. At room temperature, this was typically  $\sim 5$  min and remained stable for at least 30 min. Endpoint fluorescence values were normalized as described in the previous section with wells containing FCCP serving as positive controls for the  $\Delta\Psi_m$  assays.

### cGPDH and mGPDH Activity

The effects of small-molecule inhibitors on cGPDH and mGPDH enzymatic activity were tested according to established procedures. Activity of purified rabbit muscle cGPDH was measured as described by the manufacturer as the rate of oxidation of NADH in the presence of DHAP on the Varian fluorimeter ( $\lambda_{\text{ex}} = 365$  nm,  $\lambda_{\text{em}} = 450$  nm). Activity of cGPDH in frozen-thawed synaptosomes was measured at 37°C in a BMG Labtech PHERAstar Plus microplate reader as the linear rate of change in NADH absorbance ( $\lambda = 340$  nm) specific to the addition of 2.5 mM DHAP and insensitive to 4  $\mu\text{M}$  rotenone. Rates were converted to nmol NADH using an extinction coefficient of  $6.22 \text{ mM}^{-1} \cdot \text{cm}^{-1}$  and a calculated pathlength of 0.6 cm.

Activity of mGPDH in frozen-thawed skeletal muscle mitochondria was measured as 2,6-dichlorophenolindophenol (DCPIP)-linked reduction by glycerol phosphate as described previously in the presence of 1  $\mu\text{M}$  free calcium [27]. Linear rates of change in absorbance ( $\lambda = 600$  nm) were measured on the PHERAstar microplate reader and converted to rates of DCPIP reduction using an extinction coefficient of  $21 \text{ mM}^{-1} \cdot \text{cm}^{-1}$  and a calculated pathlength of 0.6 cm. Kinetic parameters and inhibitor constants were determined by co-varying glycerol phosphate and novel inhibitors according to recommended procedures [37] and calculated for each data set using GraphPad Prism.  $V_{\text{max}}$  and  $K_m$  were determined using hyperbolic curves fit to the Michaelis-Menten equation:  $\text{rate} = (V_{\text{max}} \cdot [\text{substrate}]) \cdot (K_m + [\text{substrate}])^{-1}$ . Hill Slope and  $\text{IC}_{50}$  were determined using unconstrained, sigmoidal dose-response curve fits of % remaining activity against concentration of iGP.  $K_{\text{ic}}$  and  $K_{\text{iu}}$  were determined using plots of  $\text{rate}^{-1}$  vs iGP and  $\text{GP} \cdot \text{rate}^{-1}$  vs iGP, respectively [37]. Linear regression analysis yielded an average  $x$ -coordinate at which the best-fit lines intersect. These  $x$ -coordinates correspond to  $-K_{\text{ic}}$  and  $-K_{\text{iu}}$  in their respective plots [37]. The apparent  $V_{\text{max}}$  of mGPDH is dependent upon the concentration of DCPIP used [13,38]. Therefore, to determine the maximal activity of mGPDH in isolated synaptosomes, DCPIP was replaced by 1 mM potassium ferricyanide [39] and linear rates of change in absorbance ( $\lambda = 420$  nm) were converted to rates of ferricyanide reduction using an extinction coefficient of  $1.04 \text{ mM}^{-1} \cdot \text{cm}^{-1}$  and a calculated pathlength of 0.6 cm.

### Mitochondrial and Synaptosomal Respiration

The effects of small-molecule inhibitors on respiration were tested in plate-attached skeletal muscle mitochondria using a Seahorse XF24 Analyzer according to published protocols [40]. Briefly, mitochondria (2 or 4  $\mu\text{g}$  protein) were attached to Seahorse assay plates by centrifugation in a mannitol and sucrose-based medium (Seahorse MAS buffer [40]) containing 0.3% (w/v) BSA without or with 250 nM free calcium at pH 7.0. Compounds were titrated to 80  $\mu\text{M}$  on each of four parallel plates with media containing one of the following substrates: 10 mM pyruvate and 0.5 mM malate; 5 mM glutamate and 5 mM malate; 5 mM succinate and 4  $\mu\text{M}$  rotenone; or 16.7 mM glycerol phosphate and 4  $\mu\text{M}$  rotenone with 250 nM free calcium. Compounds were added in these media just prior to loading the assay plate into the Seahorse instrument. Additions were made to set respiration in basal state 2 (substrate only), phosphorylating state 3 (5 mM ADP), non-phosphorylating state 4o ( $0.5 \text{ ug} \cdot \text{mL}^{-1}$

oligomycin), and to reveal the non-mitochondrial rate (2  $\mu\text{M}$  myxothiazol and 2.5  $\mu\text{M}$  antimycin A). Each concentration of compound was tested in at least two wells on each plate. At least three biological replicates of each titration in each substrate condition were performed.

Synaptosomal respiration was tested in the Seahorse XF24 using published protocols [26,41]. Synaptosomes (20 or 25  $\mu\text{g}$  protein) were attached to polyethyleneimine and Geltrex-coated Seahorse plates by centrifugation in ionic medium [26,41] containing 10 mM glucose. Attachment buffer was carefully replaced with ionic buffer containing DMSO, 100  $\mu\text{M}$  iGP-1, 0.5 mM aminooxyacetate, or iGP-1 with aminooxyacetate, and either 10 mM pyruvate or 15 mM glucose. Plates were equilibrated for 20 min at 37°C then loaded into the instrument followed by measurement of basal respiration and injection of 5  $\mu\text{M}$  FCCP (to induce maximal, uncoupled respiration) with 4  $\mu\text{g} \cdot \text{mL}^{-1}$  oligomycin (to prevent compensatory reversal of ATP synthase). In some experiments, 10 mM oxamate was added with the FCCP/oligomycin to minimize regeneration of cytosolic  $\text{NAD}^+$  by lactate dehydrogenase. Inhibition of the malate-aspartate shuttle was defined as the difference between maximal rates  $\pm$  aminooxyacetate, expressed as % of control. Inhibition of the glycerol phosphate shuttle was the difference between maximal rates with aminooxyacetate  $\pm$  iGP-1, as % of control.

### Live Cell Imaging

The ability of iGP-1 to cross cellular membranes was evaluated in STHdhQ7 cells cultured at 33°C as described [42]. Cells were seeded on collagen-coated, Lab-Tek chambered coverglass (Nunc) 48 h before use. Prior to imaging, cells were cultured for 45 min with 65 nM LysoTracker Red  $\pm$ 250 nM bafilomycin A1. Medium was then replaced with imaging buffer (120 mM NaCl, 3.5 mM KCl, 0.4 mM  $\text{KH}_2\text{PO}_4$ , 20 mM TES, 5 mM  $\text{NaHCO}_3$ , 1.2 mM  $\text{Na}_2\text{SO}_4$ , 1.5 mM  $\text{CaCl}_2$ , 0.5 mM  $\text{MgCl}_2$ , 2 mM Glucose, and 0.2% BSA, pH 7.4) containing DMSO, 250 nM bafilomycin A1 or 100  $\mu\text{M}$  iGP-1. Cells were imaged on a Nikon Eclipse Ti-PFS inverted microscope equipped with a Cascade 512B camera (Photometrics, Tucson, AZ), a Plan Fluor 100X/1.3 oil objective, an LB-LS17 Xe-arc light source (attenuated), 10–3 excitation and emission filter wheels (Sutter Instruments, Novato, CA), and an MS-2000 linear encoded motorized stage (ASI, Eugene, OR). The filter sets, given as excitation, dichroic mirror, emission in nm/bandwidth, were, for iGP-1 (1 s exposure), 340/26, 409, 460/80 and for LysoTracker Red (100 ms exposure), 543/22, 562, 588/21 (all from Semrock, Rochester, NY). Image acquisition was controlled by NIS Elements 4.0 (Nikon, Melville, NY). Images of cell-free wells containing buffer with DMSO or iGP-1 were used for background subtraction in Image Analyst MKII (Novato, CA).

### Data Analysis

Data are presented as mean  $\pm$  S.E. or mean  $\pm$ 95% C.I. where indicated. Statistical differences between conditions were analyzed by one-way ANOVA with Newman-Keuls post-test as specified in the figure legends.  $p$  values  $<0.05$  were considered significant.

## Results

### Selectivity of Known Inhibitors of mGPDH

Analogues of glycerol phosphate, including glyceraldehyde 3-phosphate and DHAP, are established competitive inhibitors of bacterial, invertebrate, and vertebrate homologs of FAD-linked GPDH [2,13–15]. Because of their limited ability to cross membranes and their involvement in cellular metabolism, these

inhibitors are not useful in intact cells. However, neither glyceraldehyde 3-phosphate nor DHAP is oxidized by mitochondria [14] and therefore they may be useful as selective inhibitors of mGPDH in isolated mitochondria. To test this possibility, we measured their effects on the rates of  $\text{H}_2\text{O}_2$  production and levels of  $\Delta\Psi\text{m}$  in mitochondria provided with different substrates (Fig. 2).

Consistent with their known effects on mGPDH enzymatic activity [2,13–15], both glyceraldehyde 3-phosphate and DHAP inhibited the rate of  $\text{H}_2\text{O}_2$  production from mGPDH (Fig. 2A). Glyceraldehyde 3-phosphate was more potent, inhibiting nearly 80% at 2.5 mM, but DHAP was less effective. The selectivity of glyceraldehyde 3-phosphate was tested by measuring its effect on  $\text{H}_2\text{O}_2$  production from site  $\text{I}_{\text{Q}}$ , site  $\text{II}_{\text{F}}$ , and site  $\text{III}_{\text{Q}_0}$ . It significantly inhibited the rate of  $\text{H}_2\text{O}_2$  production from site  $\text{II}_{\text{F}}$  (Fig. 2B), suggesting a lack of specificity.

As expected, glyceraldehyde 3-phosphate also lowered  $\Delta\Psi\text{m}$  driven by glycerol phosphate oxidation (Fig. 2C). To test its selectivity in this assay, we also measured  $\Delta\Psi\text{m}$  driven by glutamate plus malate and by succinate.  $\Delta\Psi\text{m}$  driven by succinate was significantly increased. This increase in  $\Delta\Psi\text{m}$  was independent of changes in  $\Delta\text{pH}$  since the  $\text{K}^+/\text{H}^+$  exchanger nigericin was present in all conditions.

We conclude that glyceraldehyde 3-phosphate is not a specific inhibitor of mGPDH but also alters succinate oxidation. Therefore, even in isolated mitochondria, small metabolite inhibitors of mGPDH are limited in utility.

### Discovery of Novel Small-molecule Inhibitors of Superoxide/ $\text{H}_2\text{O}_2$ Production by mGPDH

We recently described a multiple-parallel screen for novel modulators of mitochondrial  $\text{H}_2\text{O}_2$  production [43]. Each assay in the screen was designed to either drive superoxide/ $\text{H}_2\text{O}_2$  production predominantly from one mitochondrial redox center or to report undesired effects on  $\Delta\Psi\text{m}$  (Fig. 3A). Included in this screen was an assay specific for superoxide/ $\text{H}_2\text{O}_2$  production by mGPDH. This assay was robust with a %CV for intraplate DMSO control wells of  $3.4 \pm 0.2\%$  ( $n = 40$  plates each tested in duplicate). Out of 3200 compounds arbitrarily selected from a structurally diverse chemical library and tested at 2.5  $\mu\text{M}$ , 87 (2.7%) decreased the signal in the mGPDH assay by at least 10% compared to DMSO controls (Table S1). To identify compounds that were selective for mGPDH, these 87 compounds were counter-screened using a panel of four assays that each targeted a distinct site of superoxide/ $\text{H}_2\text{O}_2$  production: site  $\text{I}_{\text{F}}/\text{DH}$ , site  $\text{I}_{\text{Q}}$ , site  $\text{II}_{\text{F}}$ , and site  $\text{III}_{\text{Q}_0}$ . Compounds that increased or decreased the signal more than 10% in any of these assays were eliminated, leaving seven (0.2%) selective mGPDH inhibitors (Fig. 3B–3G).

We subsequently obtained four of the most potent and selective of these compounds from the original supplier and retested each over a broad concentration range (0.08–80  $\mu\text{M}$ ) against a panel of eight assays of  $\text{H}_2\text{O}_2$  production targeting the five sites listed above using additional substrate conditions to better evaluate selectivity and potential mechanisms of action. Two compounds were false positives. The other two (iGP-1 and iGP-2; ChemBridge #5224148 and #5224147; Fig. 4) differed structurally by a single atom and each retested well. Another of the seven hits, #5244345, was also structurally similar to these two but displayed less selectivity and was not retested. The most potent compound in the initial screen against  $\text{H}_2\text{O}_2$  production by mGPDH, iGP-1 (Fig. 4), remained the most potent inhibitor on retesting and also the most selective. The only non-specific effect observed was a weak inhibition of  $\text{H}_2\text{O}_2$  production from site  $\text{I}_{\text{Q}}$  at the low concentration of succinate (see below). In contrast, iGP-2 (Fig. 4) was slightly less potent and had stronger off-target effects on sites

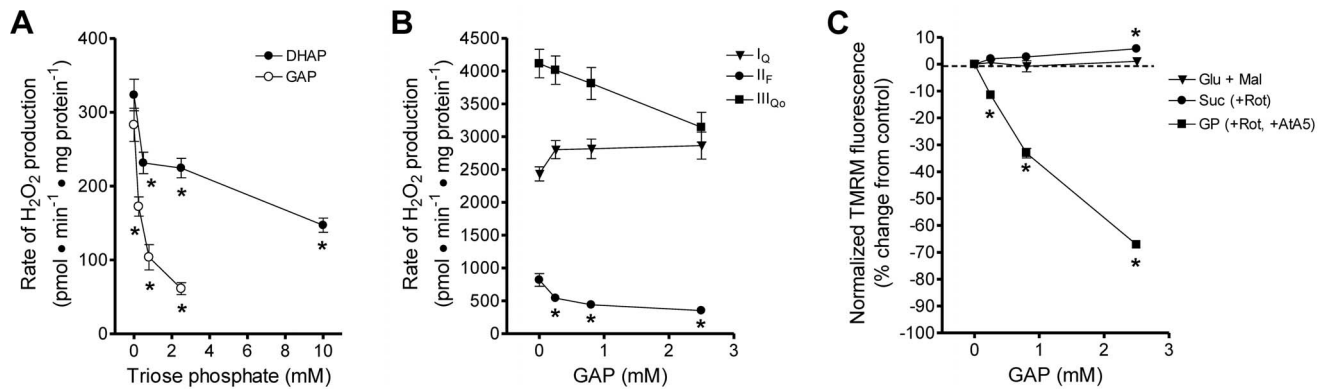

**Figure 2. Small-metabolite inhibitors of mGPDH are not selective.** (A) Effect of DHAP (black circles) and glyceraldehyde 3-phosphate (white circles) on the rate of H<sub>2</sub>O<sub>2</sub> production in the presence of 1.7 mM glycerol phosphate, 4 μM rotenone, 2 μM myxothiazol, 2.5 μM antimycin A, and 250 nM free calcium. The rate of H<sub>2</sub>O<sub>2</sub> production by mGPDH was significantly inhibited by each triose phosphate (\**p*<0.05 versus buffer control; one-way ANOVA with Newman-Keuls post-test). Data are means ± S.E. (n=3). (B) Effect of glyceraldehyde 3-phosphate on the rate of H<sub>2</sub>O<sub>2</sub> production from site I<sub>Q</sub> (triangles; 5 mM succinate), site II<sub>F</sub> (circles; 0.5 mM succinate, 4 μM rotenone, 2 μM myxothiazol, 2.5 μM antimycin A), and site III<sub>Q<sub>o</sub></sub> (squares; 5 mM succinate, 3 mM malonate, 4 μM rotenone, 2.5 μM antimycin A). The rate of H<sub>2</sub>O<sub>2</sub> production by site II<sub>F</sub> was significantly inhibited (\**p*<0.05 versus buffer control; one-way ANOVA with Newman-Keuls post-test). Data are means ± S.E. (n=3). (C) Effect of glyceraldehyde 3-phosphate on ΔΨ<sub>m</sub> powered by 5 mM glutamate and 5 mM malate (triangles), or 16.7 mM glycerol phosphate with 4 μM rotenone and 2 μM atpenin A5 (squares) all in the presence of 80 ng · ml<sup>-1</sup> nigericin to collapse ΔpH. ΔΨ<sub>m</sub> powered by glycerol phosphate was significantly decreased at all concentrations of glyceraldehyde 3-phosphate tested. ΔΨ<sub>m</sub> powered by succinate was significantly increased at 2.5 mM glyceraldehyde 3-phosphate. (\**p*<0.05 versus buffer control; one-way ANOVA with Newman-Keuls post-test). Data are means ± S.E. (n=3). GAP, glyceraldehyde 3-phosphate; Glu, glutamate; Mal, malate; Suc, succinate; Rot, rotenone; GP, glycerol phosphate; AtA5, atpenin A5. When not visible, error bars are obscured by the symbol. doi:10.1371/journal.pone.0089938.g002

I<sub>Q</sub> and III<sub>Q<sub>o</sub></sub>. The end result of our unbiased, multiple parallel chemical screens was a set of novel potent inhibitors of superoxide/H<sub>2</sub>O<sub>2</sub> production by mGPDH that demonstrated differing selectivity as a result of subtle structural changes. We chose to investigate further the effects of this structural class of compounds on mitochondrial function.

### Analysis of Structure/activity Relationships of Novel mGPDH Inhibitors

Motivated by the observation that subtle changes in structure resulted in changes to both the potency and selectivity of our novel mGPDH inhibitors, we tested an additional 18 compounds structurally related to the top hits in our primary screen to identify structural features that determined the relative potency and selectivity for inhibition of H<sub>2</sub>O<sub>2</sub> production by mGPDH. These 20 compounds were retested for effects on eight assays of site-specific H<sub>2</sub>O<sub>2</sub> production and four assays of ΔΨ<sub>m</sub> utilizing different mitochondrial substrates (Fig. 4). To identify structure/activity relationships, compounds were placed into four groups according to common generalized structural differences compared to the original parent compound iGP-1 and evaluated for effects on the 12 assays of mitochondrial function to determine shared effects among group members. Several critical conclusions were drawn from this analysis (Fig. 4). First, as was observed in the original round of retesting described above, changing one of the nitrogen atoms in the benzimidazole to oxygen or sulfur (iGP-2 and iGP-3) had little effect on potency against mGPDH yet decreased selectivity. Specifically, these compounds inhibited H<sub>2</sub>O<sub>2</sub> production by site I<sub>Q</sub> to a greater extent and also increased ΔΨ<sub>m</sub> both in the presence and absence of nigericin. These effects on ΔΨ<sub>m</sub> in the presence of nigericin were subsequently found to be caused largely by artifactual quenching of TMRM fluorescence by the compounds (data not shown). However, the much larger increase in ΔΨ<sub>m</sub> observed in the absence of nigericin was found to represent a true change in ΔΨ<sub>m</sub>, most likely a collapse in the ΔpH

component of the protonmotive force. This decrease in ΔpH may explain the greater effect of these structural analogs on H<sub>2</sub>O<sub>2</sub> production by site I<sub>Q</sub> since this site is known to be uniquely sensitive to ΔpH [44]. Intriguingly, three of four compounds in which additional groups were attached to the free end of the benzimidazole ring were more potent inhibitors of mGPDH (iGP-4–iGP-7). However, these three also had decreased selectivity in similar ways to those observed with changes to the heteroatom of this ring system. The orientation of the benzimidazole and succinamide groups off the central phenyl ring also influenced potency versus mGPDH ROS production. Changing the relative positioning of these groups from *ortho*- to *para*-lowered the potency by more than 5-fold (iGP-8). Importantly, altering the carboxyl end of the succinamic acid group decreased potency and selectivity for mGPDH, if any inhibition remained at all (iGP-9–iGP-16). Similarly, the benzimidazole ring was required for inhibition of mGPDH (iGP-17–iGP-20). Ultimately, while our structure/activity analysis yielded no compound with improvements to both potency and selectivity against mGPDH, it provided insight into the structural elements essential to mGPDH inhibition and useful clues as to which chemical features should likely be targeted in future optimization studies.

### iGPs Inhibit mGPDH Enzymatic Activity

iGP-1 and iGP-2 did not inhibit ΔΨ<sub>m</sub> driven with glutamate and malate in our initial screen (Fig. 3G). This observation was confirmed during retesting. However, ΔΨ<sub>m</sub> driven by glycerol phosphate was inhibited by several iGPs indicating that these novel compounds inhibited not just H<sub>2</sub>O<sub>2</sub> production by mGPDH but also its enzymatic activity (Fig. 4). To investigate this distinction, we assayed the effect of iGP-1 on mGPDH enzymatic activity directly. iGP-1 caused significant inhibition of mGPDH enzymatic activity but, remarkably, did not inhibit the soluble form of GPDH (Fig. 5). Next, we further characterized the effects of the most selective, iGP-1, and the most potent, iGP-5, inhibitors of mGPDH on H<sub>2</sub>O<sub>2</sub> production, ΔΨ<sub>m</sub>, and respiration.



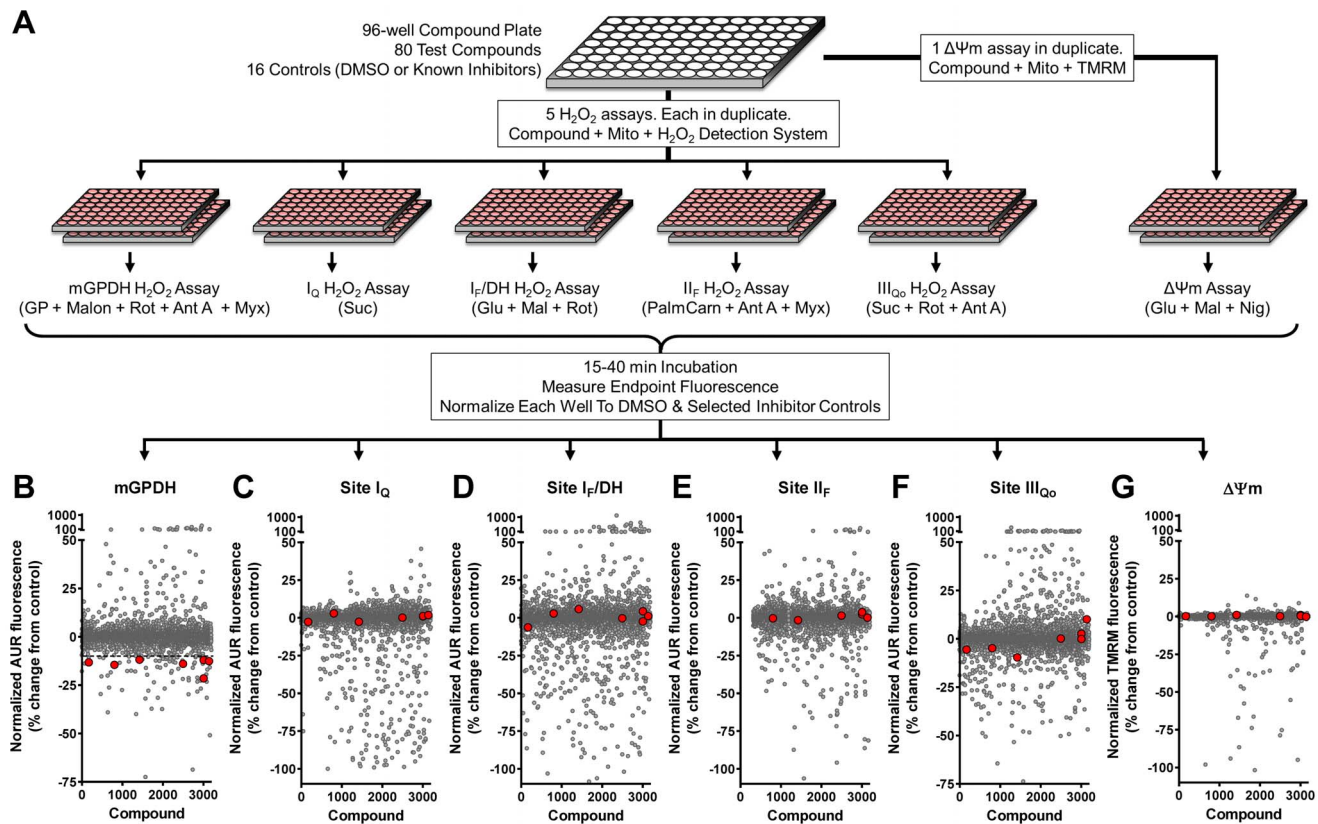

**Figure 3. Screening design for novel inhibitors of mitochondrial  $H_2O_2$  production.** (A) Screening workflow. Compounds were screened in duplicate in microplates against six assays. Five assays each targeted a distinct site of superoxide/ $H_2O_2$  production using different substrates without or with inhibitors. The sites assayed were site  $I_Q$ , site  $I_F/DH$ , site  $I_F$ , site  $III_{QO}$ , and mGPDH. A sixth assay of  $\Delta\Psi m$  was used to eliminate general inhibitors of mitochondrial function. All assays were initiated by the addition of Start Solutions containing the substrates and inhibitors listed in parentheses. Details are in “Materials and Methods” and reference 43. Endpoint fluorescence was measured and the effect of compounds was scaled to positive and negative controls included on each assay plate. (B – G) Average normalized effects of 3200 compounds screened against all six assays in duplicate (gray circles). 87 compounds gave  $>10\%$  inhibition of mGPDH superoxide/ $H_2O_2$  production (dashed line in B). However, after evaluating their effects in the other screens, only 7 were selective for superoxide/ $H_2O_2$  production from mGPDH and did not impair  $\Delta\Psi m$  driven with glutamate and malate (red circles in B – G). AUR, resorufin product of Amplex UltraRed oxidation; Suc, succinate; Glu, glutamate; Mal, malate; PalmCarn, palmitoylcarnitine; GP, glycerol 3-phosphate; Rot, rotenone; Ant A, antimycin A; Myx, myxothiazol; Malon, malonate; Nig, nigericin. doi:10.1371/journal.pone.0089938.g003

The most selective inhibitor, iGP-1 (Fig. 6A), progressively inhibited  $H_2O_2$  production by mGPDH as its concentration was increased from 0.25 to 80  $\mu M$ , with a half-maximal effect at about 8  $\mu M$  (Fig. 6B). Only above 10  $\mu M$  did iGP-1 start to inhibit  $H_2O_2$  production by site  $I_Q$ , demonstrating its good specificity. This effect on  $H_2O_2$  production by mGPDH (Fig. 6B) was mirrored over the same concentration range by significant and specific lowering of  $\Delta\Psi m$  driven by glycerol phosphate (Fig. 6C), and significant and specific inhibition of respiratory rates in mitochondria supplied with glycerol phosphate (Fig. 6D), suggesting that iGP-1 inhibited enzymatic activity of mGPDH. iGP-1 decreased  $H_2O_2$  production by site  $I_Q$  and  $\Delta\Psi m$  driven by low (0.5 mM) succinate but not by high (5 mM) succinate (Fig. 6B, 6C) indicating a subtle off-target effect on succinate oxidation. It had no effect on  $H_2O_2$  production,  $\Delta\Psi m$ , or respiration driven by oxidation of a variety of substrates including glutamate, malate, pyruvate, and palmitoylcarnitine.

Similarly, iGP-5 (Fig. 7A) significantly inhibited  $H_2O_2$  production by mGPDH as its concentration was increased from 0.08 to 80  $\mu M$ , with a half-maximal effect at about 1  $\mu M$  (Fig. 7B). It also lowered  $\Delta\Psi m$  (Fig. 7C) and inhibited respiration (Fig. 7D) driven by glycerol phosphate. iGP-5 lowered  $\Delta\Psi m$  driven by glycerol phosphate more potently than iGP-1 (Fig. 6C versus Fig. 7C).

However, this structural analog also displayed less selectivity in assays of  $H_2O_2$  production (Fig. 7B) and also significantly increased  $\Delta\Psi m$  in the absence but not the presence of nigericin, suggesting a negative effect on  $\Delta pH$  (Fig. 7C). Further, iGP-5 inhibited respiration driven by pyruvate and perhaps succinate (Fig. 7D).

### iGP-1 is Cell-permeant

We next determined if iGP-1 was cell-permeant and, therefore, potentially useful for inhibiting mGPDH *in situ*. Several iGPs exhibited fluorescence with excitation maxima between 320–360 nm and emission maxima between 360–480 nm (Fig. 8A and not shown). Cells treated with 100  $\mu M$  iGP-1 displayed fluorescence above background, with bright puncta in the cytosol, low levels in the nucleus, and intermediate levels distributed diffusely within the cytosol (Fig. 8B). Timelapse imaging of iGP-1 suggested the punctate fluorescence was in rapidly moving structures independent of the mitochondrial network (not shown). Similar distribution of cellular iGP-1 fluorescence was also observed in several other cultured cell lines (e.g. HEK-293 and PC-3). Co-labeling of cells with iGP-1 and LysoTracker Red DND-99, which localizes to acidic vesicles such as endosomes and lysosomes, revealed a high correlation between the most intense iGP-1

| iGP | ChemBridge | Structure | mGPDH<br>H <sub>2</sub> O <sub>2</sub><br>production<br>IC <sub>50</sub> (μM) | mGPDH<br>H <sub>2</sub> O <sub>2</sub><br>production<br>(% change<br>at 80 μM) | ΔΨ <sub>m</sub> with<br>GP + Nig<br>(% change<br>at 80 μM) | ΔΨ <sub>m</sub> with<br>Glu + Mal<br>(% change<br>at 80 μM) | ΔΨ <sub>m</sub> with<br>Glu + Mal<br>+ Nig<br>(% change<br>at 80 μM) | I <sub>0</sub> H <sub>2</sub> O <sub>2</sub><br>production<br>with 5 mM Suc<br>(% change<br>at 80 μM) |
|-----|------------|-----------|-------------------------------------------------------------------------------|--------------------------------------------------------------------------------|------------------------------------------------------------|-------------------------------------------------------------|----------------------------------------------------------------------|-------------------------------------------------------------------------------------------------------|
| 1   | 5224148    |           | 8                                                                             | -55                                                                            | -20                                                        | 15                                                          | 4                                                                    | -9                                                                                                    |
| 2   | 5224147    |           | 20                                                                            | -50                                                                            | 1                                                          | 107                                                         | 18                                                                   | -57                                                                                                   |
| 3   | 6527788    |           | 15                                                                            | -50                                                                            | -26                                                        | 148                                                         | 20                                                                   | -69                                                                                                   |
| 4   | 7967779    |           | 5                                                                             | -69                                                                            | -35                                                        | 49                                                          | 11                                                                   | -20                                                                                                   |
| 5   | 5768410    |           | 0.7                                                                           | -65                                                                            | -26                                                        | 106                                                         | 20                                                                   | -9                                                                                                    |
| 6   | 7892367    |           | 3                                                                             | -55                                                                            | -59                                                        | 93                                                          | 17                                                                   | -28                                                                                                   |
| 7   | 5233584    |           | n.d.                                                                          | -21                                                                            | 4                                                          | 25                                                          | 2                                                                    | 3                                                                                                     |
| 8   | 5757881    |           | 50                                                                            | -44                                                                            | -7                                                         | 3                                                           | 1                                                                    | -14                                                                                                   |
| 9   | 7360472    |           | n.d.                                                                          | -2                                                                             | 5                                                          | 26                                                          | 5                                                                    | -1                                                                                                    |
| 10  | 5180119    |           | n.d.                                                                          | 0                                                                              | -78                                                        | -58                                                         | -78                                                                  | -77                                                                                                   |
| 11  | 5233321    |           | n.d.                                                                          | -5                                                                             | 1                                                          | 54                                                          | -1                                                                   | -54                                                                                                   |
| 12  | 5751763    |           | n.d.                                                                          | -28                                                                            | 2                                                          | 10                                                          | 2                                                                    | -21                                                                                                   |
| 13  | 5957384    |           | 80                                                                            | -37                                                                            | 13                                                         | 23                                                          | 10                                                                   | -82                                                                                                   |
| 14  | 5957767    |           | n.d.                                                                          | -18                                                                            | 0                                                          | 8                                                           | 0                                                                    | -45                                                                                                   |
| 15  | 6035504    |           | n.d.                                                                          | 11                                                                             | -25                                                        | 10                                                          | -42                                                                  | -15                                                                                                   |
| 16  | 7056160    |           | n.d.                                                                          | -7                                                                             | 2                                                          | 4                                                           | 1                                                                    | -24                                                                                                   |
| 17  | 5105852    |           | n.d.                                                                          | 6                                                                              | 0                                                          | -1                                                          | -1                                                                   | -1                                                                                                    |
| 18  | 5237341    |           | n.d.                                                                          | 2                                                                              | -1                                                         | -9                                                          | -3                                                                   | 6                                                                                                     |
| 19  | 7167753    |           | n.d.                                                                          | -1                                                                             | -2                                                         | -8                                                          | -2                                                                   | 7                                                                                                     |
| 20  | 5105117    |           | n.d.                                                                          | -20                                                                            | 0                                                          | -3                                                          | -1                                                                   | -8                                                                                                    |

**Figure 4. Structure/activity analysis identifies features conferring mGPDH inhibition.** Summary of effects on H<sub>2</sub>O<sub>2</sub> production and ΔΨ<sub>m</sub> of 20 compounds structurally related to the top hit in our primary screen. Each compound was tested against eight assays of site-selective H<sub>2</sub>O<sub>2</sub>



production and four assays of  $\Delta\Psi_m$  powered by different mitochondrial substrates (see Materials and Methods for details of individual assays). Data are means of two replicates on the same plate. Five criteria best segregated these compounds according to changes in structural motifs relative to the parent compound iGP-1: potency of inhibition of mGPDH  $H_2O_2$  production (defined by estimating the  $IC_{50}$  concentration or, where an  $IC_{50}$  could not be calculated, the effect on mGPDH  $H_2O_2$  production at 80  $\mu M$ ), effect on  $\Delta\Psi_m$  powered by glycerol phosphate, effect on  $\Delta\Psi_m$  powered by glutamate plus malate in the absence or presence of the  $K^+/H^+$  exchanger nigericin, and effect on  $H_2O_2$  production by site  $I_Q$  driven by succinate. Note that because the method used to normalize mGPDH  $H_2O_2$  production in the screening assay underestimated the background rate, the maximal % inhibition for this assay was  $\sim 70\%$  (see Materials and Methods). *Glu*, glutamate; *Mal*, malate; *Nig*, nigericin; *Rot*, rotenone; *GP*, glycerol phosphate; *Suc*, succinate.

doi:10.1371/journal.pone.0089938.g004

fluorescence and acidic vesicles (Fig. 8B and 8C). Treatment of cells with 250 nM bafilomycin A1, an inhibitor of vesicular  $H^+$ -ATPases, collapsed the vesicular pH gradient (demonstrated by loss of LysoTracker Red staining) (Fig. 8E) and also caused loss of the bright, punctate staining of iGP-1 but not the diffuse fluorescence in the cytosol (Fig. 8D). To address whether iGP-1 was accumulated in acidic vesicles or if iGP-1 fluorescence was enhanced at the lower pH of these vesicles, we measured the fluorescence of iGP-1 as a function of pH. We observed an 8-fold increase in iGP-1 fluorescence as the pH was lowered from pH 7 to pH 1.5 (Fig. 8F). Further, addition of the protonophore FCCP to cells caused a rapid, though incomplete, loss of the bright, punctate staining seen with iGP-1 alone (not shown). Together, these data suggest that the intense punctate staining of iGP-1 is likely the result of a pH-dependent enhancement of iGP-1 fluorescence in acidic compartments and not accumulation in vesicles. Importantly, we can conclude that iGP-1 readily crosses cellular membranes and therefore should have access to mGPDH in intact systems.

### Effect of iGP-1 in Cellular Systems

mGPDH is a critical component of the glycerol phosphate shuttle for regenerating cytosolic  $NAD^+$ . However, because of a lack of cell-permeant selective inhibitors of mGPDH and compensation by other  $NAD^+$  regenerating mechanisms, there is a lack of evidence of functional mGPDH activity in intact systems. We tested the role of mGPDH-dependent metabolism using iGP-1 in synaptosomes because mGPDH is active in neurons [27,45,46], there is a significant role for  $NADH$  shuttles in synaptic energetics [26,47], there are no reports on neural function in mGPDH $^{-/-}$  mice, and synaptosomes are a tractable intact system for studying

neuronal energetics under tightly controlled cell-, substrate-, and demand-specific conditions.

We verified that the high mGPDH activity reported in brain was present in synaptosomes. In frozen-thawed cortical presynaptic terminals, mGPDH activity was high ( $207 \pm 16$  nmol ferricyanide reduced  $\cdot \text{min}^{-1} \cdot \text{mg protein}^{-1}$ ; mean  $\pm$  SE,  $n = 3$ ). To demonstrate the likelihood of a functional shuttle system, we measured cGPDH activity in the same preparations. There was a significant rate of DHAP-specific, rotenone-insensitive  $NADH$  oxidation that we attribute to cGPDH ( $22 \pm 1$  nmol  $NADH$  oxidized  $\cdot \text{min}^{-1} \cdot \text{mg protein}^{-1}$ ; mean  $\pm$  SE,  $n = 3$ ).

We then applied iGP-1 alone or in combination with aminooxyacetate (to inhibit the malate-aspartate shuttle) (Fig. 1B) in synaptosomes respiring on glucose (Fig. 8G). Maximal demand was created by adding FCCP (plus oligomycin to decrease ATP depletion). In control experiments, pyruvate replaced glucose to bypass the need for  $NAD^+$  regeneration (Fig. 1). 100  $\mu M$  iGP-1, 0.5 mM aminooxyacetate, or their combination had no effect on basal or maximal respiration with pyruvate (two left hand sets of columns, Fig. 8G). With glucose as substrate, basal and maximal respiration were inhibited by aminooxyacetate (two middle sets of columns, Fig. 8G), confirming a role for the malate-aspartate shuttle in synaptic bioenergetics [26,47]. However, iGP-1 had no effect even in combination with aminooxyacetate, suggesting little contribution of the glycerol phosphate shuttle.

In the absence of inhibitors, glucose supported slower respiration than pyruvate. As the result with aminooxyacetate demonstrates,  $NAD^+$  regeneration has a significant permissive role in synaptosomal metabolism of glucose but not pyruvate. There was also faster extrasynaptosomal acidification with glucose as substrate, suggesting efflux of lactate (with  $H^+$ ) to regenerate cytosolic  $NAD^+$  at lactate dehydrogenase (Fig. 1C). This would divert pyruvate destined for respiration and cause slower respiration with glucose than with pyruvate. To test this hypothesis, we added oxamate (with the FCCP and oligomycin) to inhibit lactate dehydrogenase during oxidation of glucose (Fig. 1C). This should maximally drive respiration while also placing the greatest demand on the  $NADH$  shuttles to facilitate glycolysis. Maximal respiration was substantially faster in the presence of oxamate (two right hand sets of columns, Fig. 8G), and aminooxyacetate still inhibited significantly. Importantly, although iGP-1 alone had no effect, it caused consistent additional inhibition in the presence of aminooxyacetate. Thus, there was a significant dependence of uncoupled respiration on both the malate-aspartate shuttle ( $45.9 \pm 0.7\%$ ) and the glycerol phosphate shuttle ( $5.3 \pm 0.9\%$ ) (means  $\pm$  SE,  $n = 5$ ) (Fig. 8H).

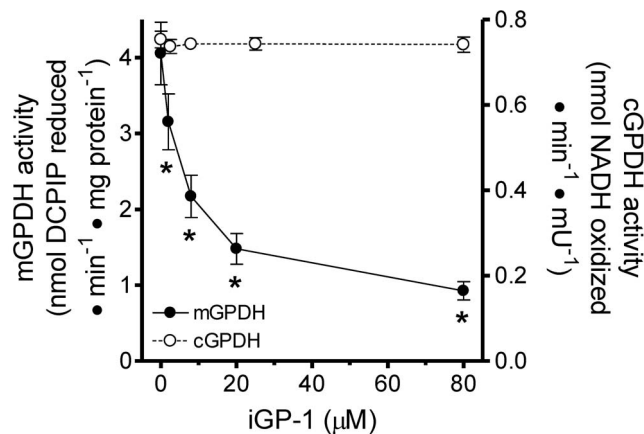

**Figure 5. iGP-1 selectively inhibits the mitochondrial isoform of GPDH.** Effect of iGP-1 on the enzymatic activities of mGPDH (black circles) and cGPDH (white circles). iGP-1 significantly inhibited mGPDH activity at all concentrations tested. (\* $p < 0.05$  versus vehicle control; one-way ANOVA with Newman-Keuls post-test). Data are means  $\pm$  S.E. ( $n = 4$  for mGPDH,  $n = 3$  for cGPDH). doi:10.1371/journal.pone.0089938.g005

### Characterization of the Effects of Novel Inhibitors on the Kinetics of mGPDH

The greater potency of iGP-5 versus iGP-1 was confirmed against both mGPDH activity (Fig. 9A and Table 1;  $IC_{50} = 1.0$   $\mu M$  and 6.3  $\mu M$ , respectively) and  $H_2O_2$  production (Fig. 9B and Table 1;  $IC_{50} = 1.0$   $\mu M$  and 13.6  $\mu M$ , respectively). Inhibition of mGPDH by both iGP-1 and iGP-5 displayed a

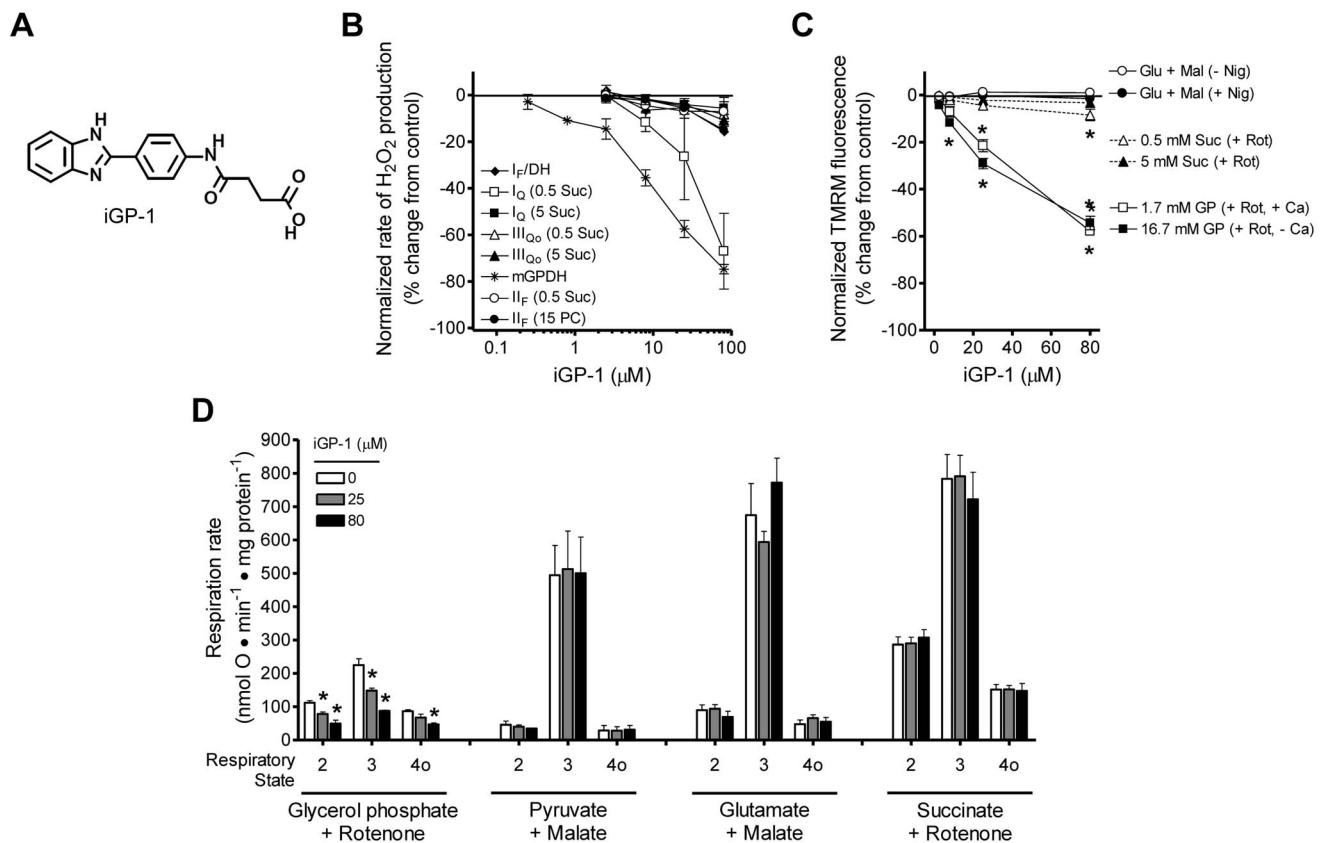

**Figure 6. iGP-1 selectively inhibits mitochondrial oxidation of glycerol phosphate.** (A) Structure of iGP-1. (B) Effect of iGP-1 on rates of  $\text{H}_2\text{O}_2$  production from site  $\text{I}_F/\text{DH}$  (black diamonds), site  $\text{I}_Q$  (with 0.5 or 5 mM succinate; white and black squares, respectively), site  $\text{III}_{\text{O}_2}$  (with 0.5 or 5 mM succinate; white and black triangles, respectively), mGPDH (black stars), and site  $\text{II}_F$  (with 0.5 mM succinate or 15  $\mu\text{M}$  palmitoylcarnitine; white and black circles, respectively) measured in a fluorimeter. Details of the conditions to induce  $\text{H}_2\text{O}_2$  production from each site are given in Materials and Methods. iGP-1 inhibits  $\text{H}_2\text{O}_2$  production in a site-specific manner from mGPDH. Inhibition of site  $\text{I}_Q$   $\text{H}_2\text{O}_2$  production driven with 0.5 mM succinate alone (white squares) seen at high concentrations of iGP-1 is neither site- nor substrate-selective since site  $\text{I}_Q$   $\text{H}_2\text{O}_2$  production driven with 5 mM succinate (black squares) is not affected and neither site  $\text{II}_F$  nor site  $\text{III}_{\text{O}_2}$   $\text{H}_2\text{O}_2$  production driven with 0.5 mM succinate (white circles and triangles) is altered. Data are normalized means  $\pm$  S.E. ( $n=4$  for mGPDH,  $n=3$  for all other sites). (C) Effect of iGP-1 on  $\Delta\Psi\text{m}$  powered by 5 mM glutamate and 5 mM malate without or with 80  $\text{ng} \cdot \text{mL}^{-1}$  nigericin (white or black circles), 4  $\mu\text{M}$  rotenone and 0.5 or 5 mM succinate (white or black triangles), 1.7 mM glycerol phosphate, 4  $\mu\text{M}$  rotenone, and 250 nM free calcium (white squares), or 16.7 mM glycerol phosphate, 4  $\mu\text{M}$  rotenone, and nominal zero free calcium (black squares).  $\Delta\Psi\text{m}$  powered by glycerol phosphate was significantly decreased in the presence of 8, 25, and 80  $\mu\text{M}$  iGP-1.  $\Delta\Psi\text{m}$  powered by 0.5 mM succinate was significantly decreased by 80  $\mu\text{M}$  iGP-1 whereas no effect was seen on  $\Delta\Psi\text{m}$  powered by 5 mM succinate or by glutamate and malate. (\* $p<0.05$  versus vehicle control; one-way ANOVA with Newman-Keuls post-test). Data are normalized means  $\pm$  S.E. ( $n=3-5$ ). (D) Effect of iGP-1 on the rates of mitochondrial respiration driven by 16.7 mM glycerol phosphate with 4  $\mu\text{M}$  rotenone and 250 nM free calcium, 10 mM pyruvate and 0.5 mM malate, 5 mM glutamate and 5 mM malate, or 5 mM succinate and 4  $\mu\text{M}$  rotenone. Respiratory states 2, 3, and 4o were defined by the sequential additions of substrate, 5 mM ADP, and 0.5  $\mu\text{g} \cdot \text{mL}^{-1}$  oligomycin, respectively. iGP-1 significantly decreased glycerol phosphate-dependent respiration at 25 and 80  $\mu\text{M}$  without altering respiration on other substrates. (\* $p<0.05$  versus vehicle control; one-way ANOVA with Newman-Keuls post-test). Data are means  $\pm$  S.E. ( $n=3$  for pyruvate and malate,  $n=5$  for all other substrates). No significant effects were observed under any condition with iGP-1 at 2.5 and 8  $\mu\text{M}$  (not shown). *Glu*, glutamate; *Mal*, malate; *Nig*, nigericin; *Suc*, succinate; *PC*, palmitoylcarnitine; *Rot*, rotenone; *GP*, glycerol phosphate; *Ca*, calcium. When not visible, error bars are obscured by the symbol. doi:10.1371/journal.pone.0089938.g006

selective, one-site binding profile (Table 1; Hill slopes 0.92 and 0.85, respectively). These data support the conclusion that these novel compounds inhibit mGPDH enzymatic activity and confirm that iGP-1 is the most selective of the potent inhibitors we have identified. We next characterized the mechanism of action of this novel class of mGPDH enzymatic inhibitors by measuring the effects on the kinetics of mGPDH. We assayed mGPDH activity at different concentrations of glycerol phosphate and inhibitor (either iGP-1 or iGP-5). These data (Fig. 10A, 10B) showed that the maximum observed rate of DCPIP reduction by mGPDH decreased as the inhibitor concentration increased.

Analysis of double reciprocal plots (Fig. 10C, 10D) showed that each inhibitor lowered the  $V_{\text{max}}$  and increased the  $K_{\text{m}}$  for glycerol phosphate. Fig. 10E shows that the apparent  $V_{\text{max}}$  was progres-

sively decreased by each inhibitor with iGP-5 more potent than iGP-1. Fig. 10F shows that the  $K_{\text{m}}$  for glycerol phosphate was progressively increased; again, iGP-5 was more potent than iGP-1. This profile of lowered  $V_{\text{max}}$  combined with a change in  $K_{\text{m}}$  is indicative of a mixed inhibitor (Fig. 10G) that interacts competitively with respect to the substrate (defined by the competitive inhibitor dissociation constant  $K_{\text{ic}}$ ) and uncompetitively with the enzyme-substrate complex (defined by the uncompetitive inhibitor dissociation constant  $K_{\text{iu}}$ ). Values for these dissociation constants were in the 10  $\mu\text{M}$  range for iGP-1 and the 1  $\mu\text{M}$  range for iGP-5 (Table 1).

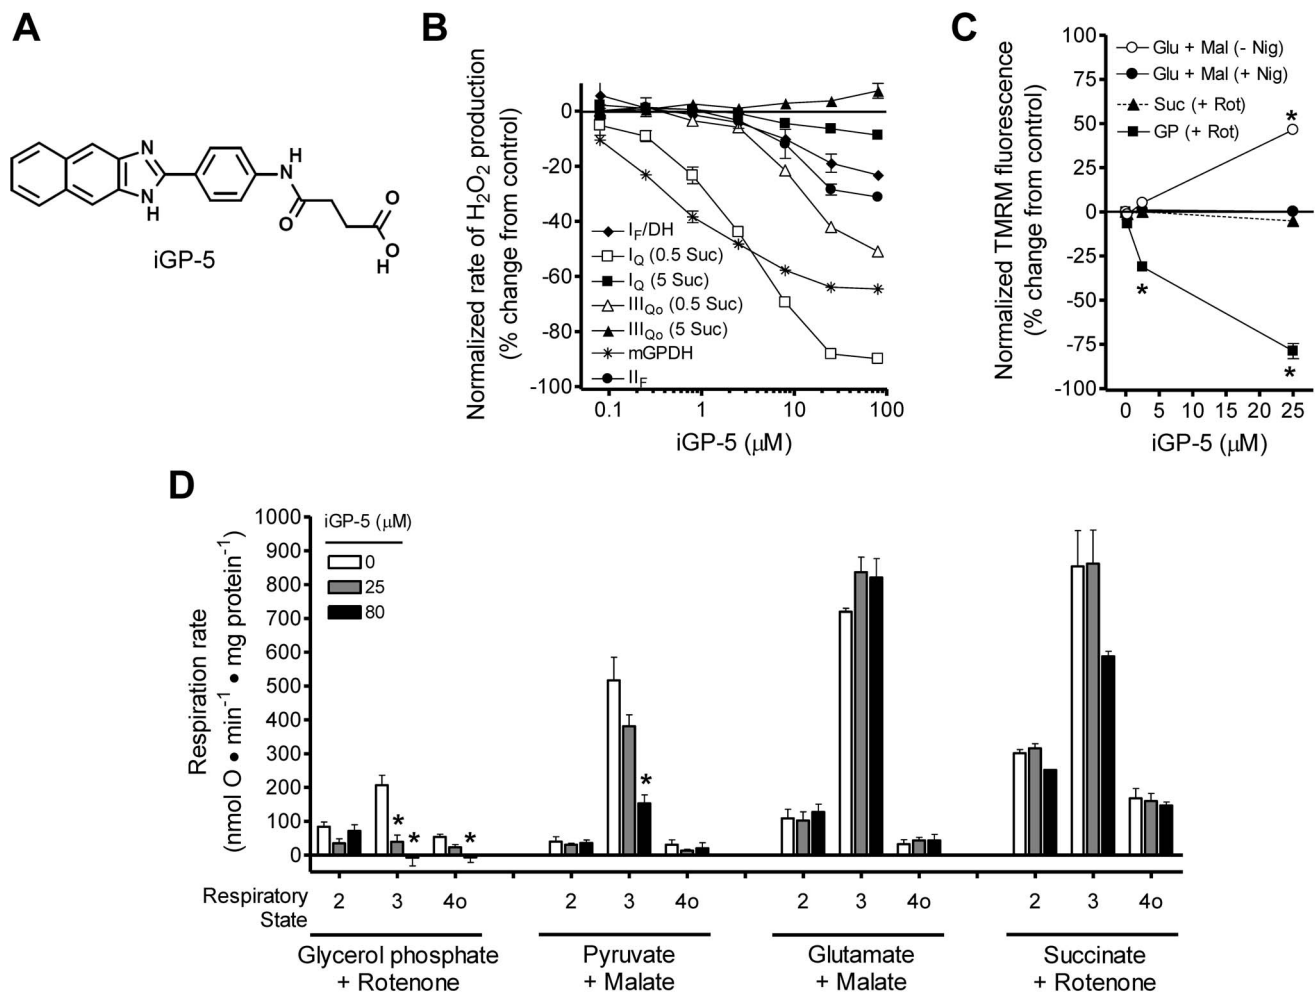

**Figure 7. iGP-5 inhibits mGPDH activity more potently than iGP-1 but is less selective.** (A) Structure of iGP-5. (B) Effect of iGP-5 on rates of  $H_2O_2$  production from site  $I_F/DH$  (black diamonds), site  $I_Q$  (with 0.5 or 5 mM succinate; white and black squares, respectively), site  $III_{Q_0}$  (with 0.5 or 5 mM succinate; white and black triangles, respectively), mGPDH (black stars), and site  $II_F$  (with 15  $\mu M$  palmitoylcarnitine; black circles) measured in microplate format. Details of the conditions to induce  $H_2O_2$  production from each site are given in Materials and Methods. iGP-5 potently inhibits  $H_2O_2$  production from mGPDH but also causes progressive changes at several other sites of production. Data are normalized means  $\pm$  ranges ( $n=2$  technical replicates). (C) Effect of iGP-5 on  $\Delta\Psi m$  powered by 5 mM glutamate and 5 mM malate without or with 80  $ng \cdot mL^{-1}$  nigericin (white or black circles), 5 mM succinate and 4  $\mu M$  rotenone (black triangles), or 16.7 mM glycerol phosphate and 4  $\mu M$  rotenone (black squares).  $\Delta\Psi m$  powered by glycerol phosphate was significantly decreased by 2.5 and 25  $\mu M$  iGP-5.  $\Delta\Psi m$  powered by glutamate and malate was significantly increased by 25  $\mu M$  iGP-5 but only in the absence of nigericin (white circles) suggesting an effect of iGP-5 on the  $\Delta pH$  component on the proton motive force. (\* $p < 0.05$  versus vehicle control; one-way ANOVA with Newman-Keuls post-test). Data are normalized means  $\pm$  S.E. ( $n=3$ ). (D) Effect of iGP-5 on the rates of mitochondrial respiration driven by 16.7 mM glycerol phosphate with 4  $\mu M$  rotenone and 250 nM free calcium, 10 mM pyruvate and 0.5 mM malate, 5 mM glutamate and 5 mM malate, or 5 mM succinate and 4  $\mu M$  rotenone. Respiratory states 2, 3, and 4o were defined by the sequential additions of substrate, 5 mM ADP, and 0.5  $\mu g \cdot mL^{-1}$  oligomycin, respectively. iGP-5 significantly decreased glycerol phosphate-dependent state 3 respiration at 25 and 80  $\mu M$  but also significantly reduced state 3 respiration with pyruvate and malate at 80  $\mu M$ . (\* $p < 0.05$  versus vehicle control; one-way ANOVA with Newman-Keuls post-test). Data are means  $\pm$  S.E. ( $n=3$ ). No significant effects were observed under any condition with iGP-5 at 2.5 and 8  $\mu M$  (not shown). *Glu*, glutamate; *Mal*, malate; *Nig*, nigericin; *Suc*, succinate; *Rot*, rotenone; *GP*, glycerol phosphate. When not visible, error bars are obscured by the symbol. doi:10.1371/journal.pone.0089938.g007

## Discussion

There is a longstanding need for potent, selective, cell-permeant inhibitors of mGPDH [3,24]. mGPDH knockout mice indicated a significant role for mGPDH in the survival of nursing pups and in adult adiposity [11], but more effort was required to identify the subtle roles of mGPDH in glucose-stimulated insulin secretion, obligatory thermogenesis, glycerol and fat metabolism, and, specific to mice, liver ureogenesis [12,48–50]. Such long-term studies involving genetic manipulation, condition-dependent phenotypes, and/or pharmacologic interventions are complicated

by compensatory mechanisms that mask the involvement of mGPDH. Several 3-carbon glycolytic intermediates, as well as fatty acids and inorganic ions, are known to inhibit mGPDH [2,13–16]. However, many are membrane impermeant, none are selective, and, as we show for the potent competitive inhibitor glyceraldehyde 3-phosphate, can be non-selective even in isolated mitochondria (Fig. 2). Therefore, our novel class of inhibitors offers the first opportunity to acutely test the role of mGPDH activity in a more diverse range of physiological conditions.

Small-molecule screening for modulators of mitochondrial  $H_2O_2$  production proved to be an effective strategy for identifying

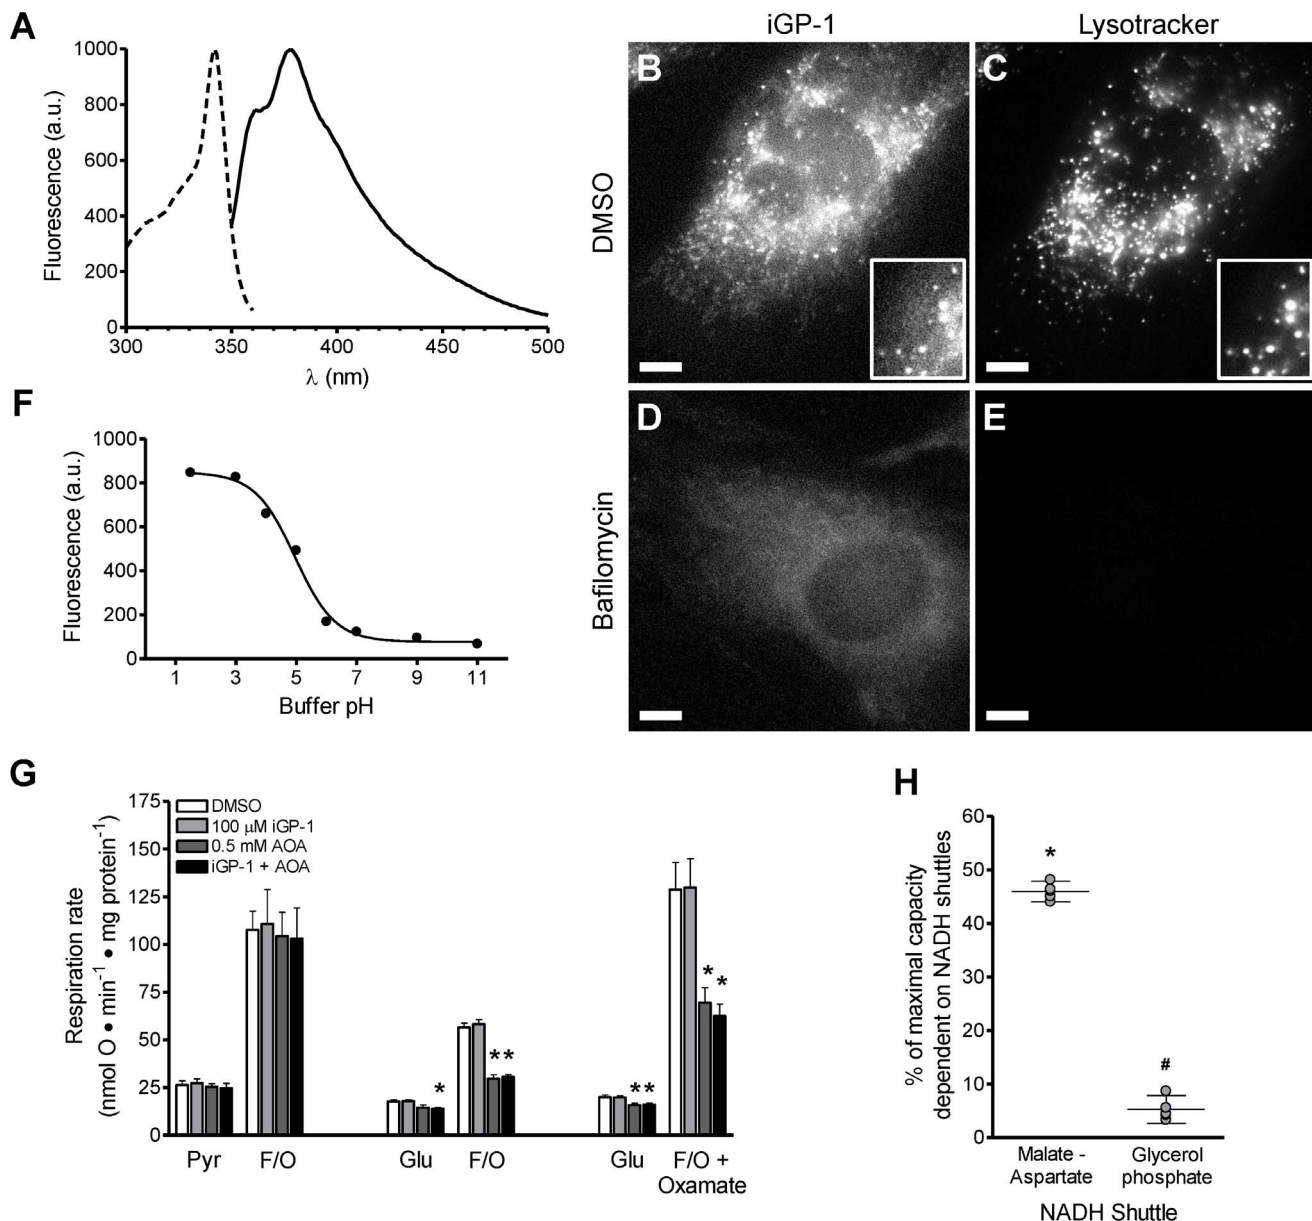

**Figure 8. iGP-1 is cell-permeant and inhibits mGPDH in intact presynaptic terminals.** (A) Excitation and emission spectra of 0.4 mM iGP-1 with peaks at 342 nm and 378 nm, respectively. (B) Fluorescence of 100  $\mu\text{M}$  iGP-1 in a live STHdhQ7 cell labeled with LysoTracker Red. (C) Fluorescent labeling of acidic vesicles by LysoTracker Red in the same cell shown in (B). Insets in (B and C) highlight colocalization between intense iGP-1 fluorescence and LysoTracker Red labeled vesicles. (D) Fluorescence of 100  $\mu\text{M}$  iGP-1 in a live STHdhQ7 cell pretreated with 250 nM bafilomycin A1. (E) LysoTracker Red fluorescence in the same cell pretreated with bafilomycin A1 as in (D). Scale bar in (B – E) = 10  $\mu\text{m}$ . (F) iGP-1 fluorescence as a function of buffer pH (ex.  $\lambda$  = 342 nm, em.  $\lambda$  = 430 nm). (G) Effect of vehicle control (DMSO, white bars), 100  $\mu\text{M}$  iGP-1 (light gray bars), 0.5 mM aminooxyacetate (dark gray bars), or their combination (black bars) on synaptosomal respiration. Basal respiration was measured in the presence of either 10 mM pyruvate or 15 mM glucose followed by the addition of 5  $\mu\text{M}$  FCCP and 4  $\mu\text{g} \cdot \text{mL}^{-1}$  oligomycin to induce uncoupled respiration without or with (rightmost condition) 10 mM oxamate. Oxamate was included to minimize regeneration of cytosolic  $\text{NAD}^+$  by lactate dehydrogenase. Respiration on pyruvate alone was not altered by inhibition of either or both of the NADH shuttle systems. Both basal and uncoupled respiration on glucose was unaffected by iGP-1 alone but significantly decreased by aminooxyacetate alone. Oxamate increased the maximal rate of respiration achieved by glucose alone. In the presence of oxamate, the combination of iGP-1 combined with aminooxyacetate consistently decreased the maximal uncoupled rate compared to aminooxyacetate alone. (\* $p < 0.05$  versus vehicle control and iGP-1 alone; one-way ANOVA with Newman-Keuls post-test). Data are means  $\pm$  S.E. ( $n = 3$  for pyruvate,  $n = 4$  for glucose,  $n = 5$  for glucose  $\pm$  oxamate). (H) Assignment of the % of maximal respiration that is dependent on the NADH shuttles in the presence of glucose and oxamate. Under this condition of high glycolytic demand, there is a significant dependence upon both the malate-aspartate shuttle and the glycerol phosphate shuttle. (\* $p < 0.05$  versus no change from vehicle control; # $p < 0.05$  versus no change from aminooxyacetate). Data are means  $\pm$  95% C.I. ( $n = 5$ ). AOA, aminooxyacetate; Pyr, pyruvate; F/O, FCCP with oligomycin; Glu, glucose.

doi:10.1371/journal.pone.0089938.g008

selective inhibitors of mGPDH. The design of the different assays of mitochondrial  $\text{H}_2\text{O}_2$  production and  $\Delta\Psi\text{m}$  executed in parallel

during primary screening and retesting provided multiple filters through which non-selective hits were readily eliminated. Three of

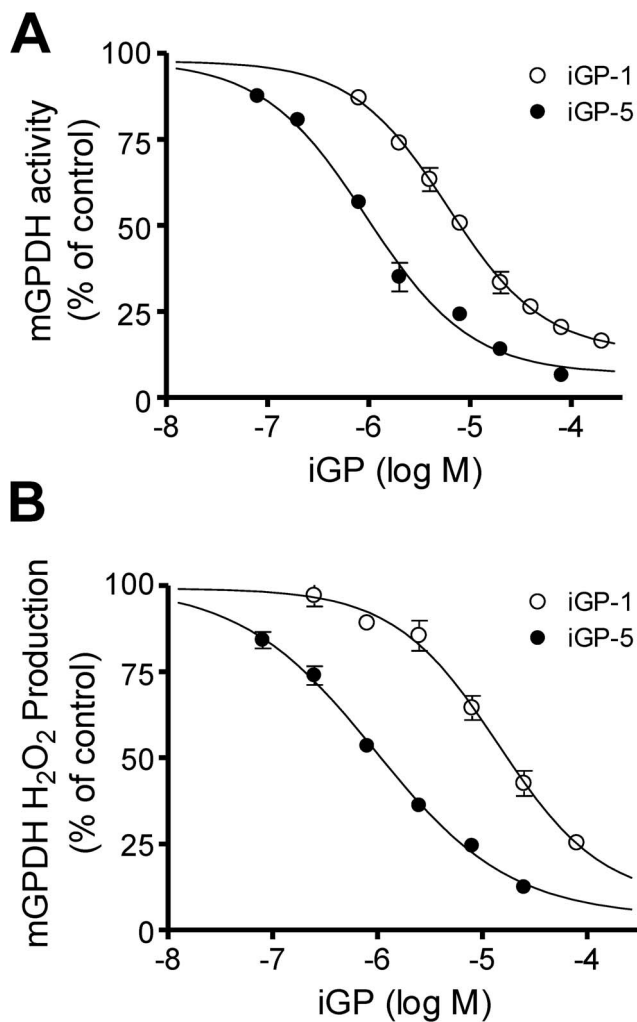

**Figure 9. iGP-1 and iGP-5 potently inhibit mGPDH enzymatic activity and H<sub>2</sub>O<sub>2</sub> production.** (A) iGP-5 (black circles) is a more potent inhibitor of mGPDH enzymatic activity than iGP-1 (white circles). IC<sub>50</sub> concentrations were 1.0 and 6.0 μM for iGP-5 and iGP-1, respectively. Data are means ± S.E. (error bars) (n=3–5). (B) iGP-5 (black circles) is a more potent inhibitor of mGPDH H<sub>2</sub>O<sub>2</sub> production than iGP-1 (white circles). IC<sub>50</sub> concentrations were 1.0 and 14.2 μM for iGP-5 and iGP-1, respectively. Data are means ± S.E. (error bars) (n=2–4). When not visible, error bars are obscured by the symbol. doi:10.1371/journal.pone.0089938.g009

the top seven most selective mGPDH inhibitors shared significant structural similarity and the most potent inhibitor in the initial screen, iGP-1, turned out to be the most selective of all the potent analogs identified during subsequent retesting. The design of our screening and retesting strategy also meant that partial selectivity in certain assays yielded insights into potential mechanisms of off-

target effects. Combining these insights into an analysis of structure/activity relationships, we revealed that both the succinamic acid and benzimidazole motifs are essential components for mGPDH inhibition by iGPs. Importantly, this analysis identified the benzimidazole ring system as the best candidate for further manipulations to improve both potency and selectivity. In particular, changing or removing the heteroatoms of the imidazole might improve selectivity whereas added substituents to the ring system may provide a means to improve both qualities. We were not able to explore targeted changes to the chemical space occupied by either the linking phenyl group or the succinamide group that did not involve loss of the terminal carboxylic acid. Therefore, these motifs may also provide additional opportunities for improved activity.

Enzyme kinetics revealed that iGPs share a common mechanism of mixed inhibition with respect to glycerol 3-phosphate and that potency was governed by subtle structural changes. Both iGP-1 and iGP-5 lowered the maximal activity of mGPDH and increased the  $K_m$  for glycerol 3-phosphate. Inhibition was enzyme specific, as iGP-1 had no effect on NAD-linked cGPDH activity. This is not surprising considering the two forms are distinct in all respects except their ability to oxidize glycerol 3-phosphate to DHAP. However, this enzyme specificity suggests that iGPs are likely not acting as inhibitory analogs in the substrate binding pocket as described for non-selective inhibitors of both forms such as glyceraldehyde 3-phosphate (data not shown and [2,13–15]). The observation of increased  $K_m$  as well as the lower values for  $K_{ic}$  than  $K_{iu}$  indicates that both iGP-1 and iGP-5 have a greater affinity for free enzyme (i.e. mGPDH without glycerol phosphate bound). Both inhibitors have Hill slopes near unity, suggesting they interact with mGPDH at a single, allosteric binding site. Although the analysis of inhibition kinetics was performed in the presence of activating calcium, our evidence from assays of mGPDH-specific H<sub>2</sub>O<sub>2</sub> production (data not shown) and  $\Delta\Psi_m$  driven by glycerol phosphate (Fig. 6C) suggest that iGPs act independently of the calcium-sensing mechanism of mGPDH. We cannot rule out direct interactions between iGPs and either the FAD binding domain in the soluble portion of mGPDH or the ubiquinone binding pocket embedded in the outer leaflet of the inner mitochondrial membrane [2]. The interaction with the ubiquinone pocket might be tested by studies similar to those presented here but with differing ubiquinol as the electron donor to the enzyme. Future co-crystallization structural studies and enzymatic assays of iGPs with the bacterial or mammalian FAD-linked GPDH may provide the best opportunities to identify the exact mode of interaction and mechanism of action of these novel inhibitors.

As initial confirmed hits in a small-molecule screen, our most promising iGPs demonstrate excellent potency (IC<sub>50</sub> values between 1–15 μM) and good selectivity. Apart from a subtle effect on succinate oxidation at high concentrations, iGP-1 does not alter mitochondrial oxidation of numerous substrates including a second dicarboxylate, malate. Therefore, it is unlikely that the

**Table 1.** Inhibition parameters for iGP-1 and iGP-5.

| Inhibitor | mGPDH Activity Hill Slope | mGPDH Activity IC <sub>50</sub> (μM) | mGPDH H <sub>2</sub> O <sub>2</sub> Production IC <sub>50</sub> (μM) | $K_{ic}$ (μM) | $K_{iu}$ (μM) |
|-----------|---------------------------|--------------------------------------|----------------------------------------------------------------------|---------------|---------------|
| iGP-1     | 0.92±0.08                 | 6.3±0.7                              | 13.6±1.3                                                             | 9.5±1.1       | 14.6±1.5      |
| iGP-5     | 0.85±0.07                 | 1.0±0.2                              | 1.0±0.1                                                              | 0.7±0.0       | 1.1±0.0       |

Summary of inhibitor parameters and constants derived from the data presented in Fig. 9 and Fig. 10. doi:10.1371/journal.pone.0089938.t001

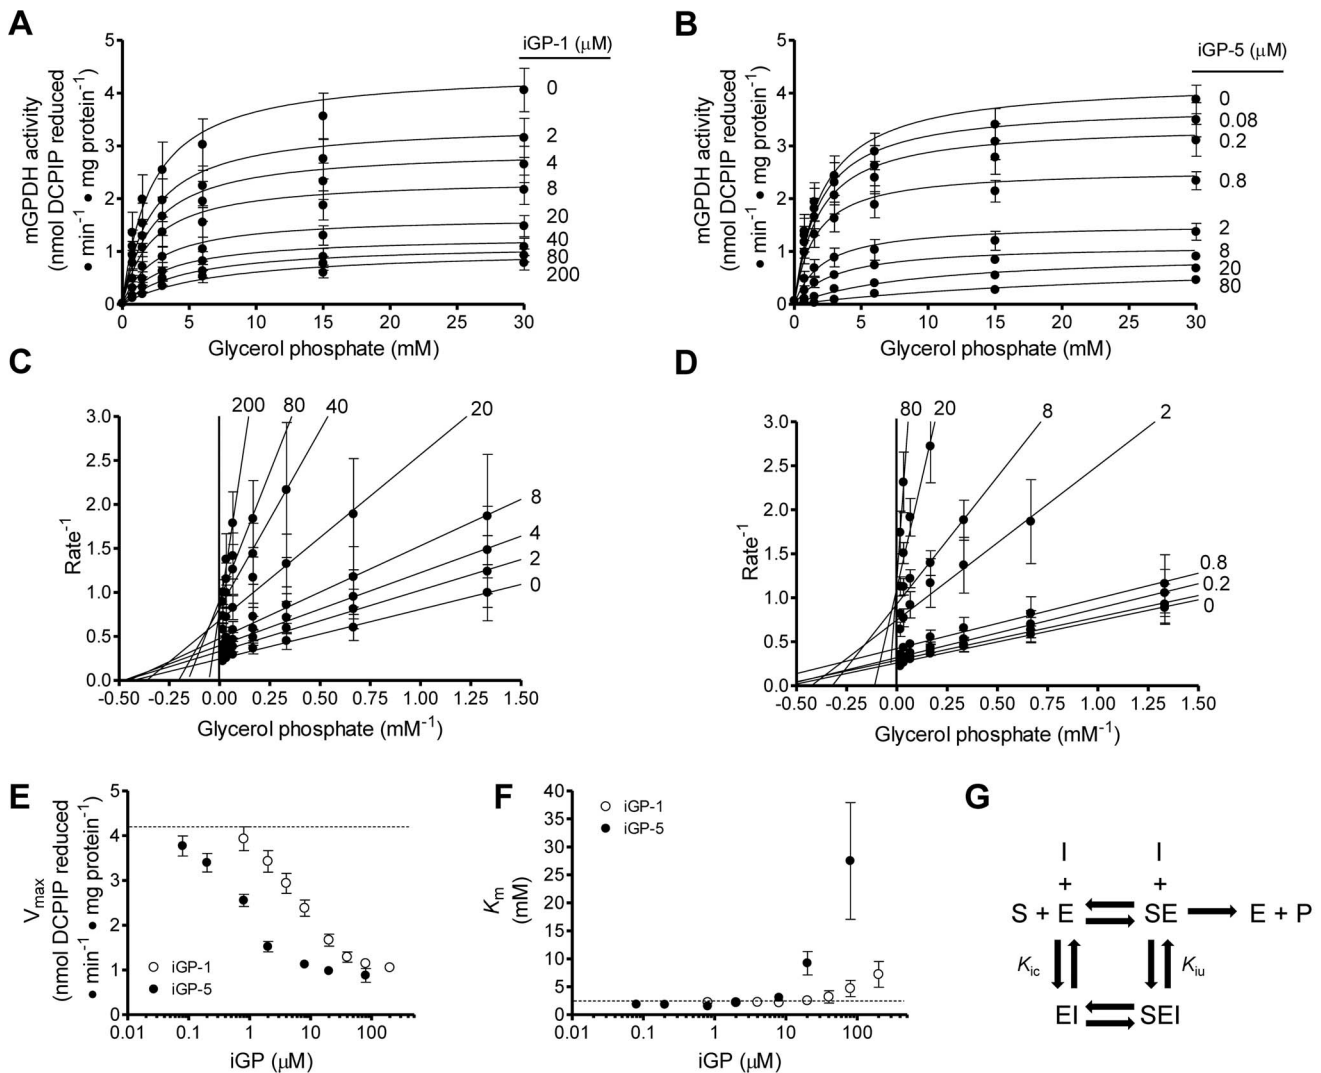

**Figure 10. iGP-1 and iGP-5 produce mixed inhibition kinetics.** (A) Effect of co-varying iGP-1 and glycerol phosphate on mGPDH activity. Curves are hyperbolic best-fits of the Michaelis-Menten equation:  $mGPDH\ activity = (V_{max} \cdot [Glycerol\ phosphate]) \cdot (K_m + [Glycerol\ phosphate])^{-1}$ . Data are means  $\pm$  S.E. (n = 3–4). (B) Effect of co-varying iGP-5 and glycerol phosphate on mGPDH activity. Data are means  $\pm$  S.E. (n = 3–5). (C) Double reciprocal plot of the data in (A). Data are means  $\pm$  S.E. (n = 3–4). (D) Double reciprocal plot of the data in (B). Data are means  $\pm$  S.E. (n = 3–5). (E) Effect of iGP-1 (white circles) and iGP-5 (black circles) on the  $V_{max}$  of mGPDH activity.  $V_{max}$  values at each concentration of compound were calculated for each experiment using best-fit Michaelis-Menten curves similar to those in (D and E). The dashed line denotes the mean value for the vehicle control. Data are means  $\pm$  S.E. (error bars) (n = 3–5). (F) Effect of iGP-1 (white circles) and iGP-5 (black circles) on the  $K_m$  of mGPDH.  $K_m$  values at each concentration of compound were calculated for each experiment using best-fit Michaelis-Menten curves similar to those in (D and E). The dashed line denotes the mean value for the vehicle control. Data are means  $\pm$  S.E. (n = 3–5). (G) Scheme for an enzymatic reaction in which enzyme E converts substrate S into product P in the presence of an inhibitor I that displays both competitive and uncompetitive behavior defined by inhibitor dissociation constants  $K_{ic}$  and  $K_{iu}$ , respectively [43]. doi:10.1371/journal.pone.0089938.g010

subtle effect on succinate oxidation is due to inhibition of the dicarboxylate transporter by the succinamide of iGPs. Indeed, analogs iGP-17– iGP-19 retain the succinamide without or with the attached phenyl ring yet do not alter succinate oxidation as assessed by  $H_2O_2$  production by succinate alone (Fig. 4). This suggests at least partial dependence on the benzimidazole ring system for the subtle effect of iGP-1 on succinate oxidation, perhaps *via* direct interaction with complex II. Reactions of the tricarboxylic acid cycle shared between succinate, malate, and pyruvate oxidation also do not appear to be affected by iGP-1. Further, iGP-1 shows no effects on the maintenance of proton motive force or rates of ATP synthesis with substrates other than glycerol phosphate. In addition, we can infer from the synap-

somal experiments that iGP-1 does not prevent pyruvate uptake into cells or mitochondria and does not directly alter glycolysis. Therefore, our data identify an exemplary inhibitor that is both potent and selective against mGPDH and offers structural targets through which additional improvements to these activities can be achieved.

In conclusion, we have identified a novel class of potent, selective, cell-permeant inhibitors of mGPDH that act *via* mixed inhibition. Further tests of the role of mGPDH and glycerol phosphate shuttle activities under conditions of neuronal activity or in other cell types with differing shuttle capacities will help determine those in which mGPDH activity is essential. Our novel



inhibitors of mGPDH provide means to test these possibilities pharmacologically.

## Supporting Information

**Table S1** Screening results for hits in the mGPDH ROS assay. Summary data for the 87 compounds that selectively inhibited mGPDH ROS. Each value is the average of duplicate “% change from DMSO” determined for each compound at ~2.5  $\mu$ M against 6 screening assays.

## References

- Klingenberg M (1970) Localization of the glycerol-phosphate dehydrogenase in the outer phase of the mitochondrial inner membrane. *Eur J Biochem* 13: 247–252.
- Yeh JI, Chinte U, Du S (2008) Structure of glycerol-3-phosphate dehydrogenase, an essential monotopic membrane enzyme involved in respiration and metabolism. *Proc Natl Acad Sci U S A* 105: 3280–3285.
- McKenna MC, Waagepetersen RS, Schousboe A, Sonnewald U (2006) Neuronal and astrocytic shuttle mechanisms for cytosolic-mitochondrial transfer of reducing equivalents: Current evidence and pharmacological tools. *Biochem Pharmacol* 71: 399–407.
- Wernette ME, Ochs RS, Lardy HA (1981)  $Ca^{2+}$  stimulation of rat liver mitochondrial glycerophosphate dehydrogenase. *J Biol Chem* 256: 12767–12771.
- Brown LJ, MacDonald MJ, Lehn DA, Moran SM (1994) Sequence of rat mitochondrial glycerol-3-phosphate dehydrogenase cDNA. Evidence for EF-hand calcium-binding domains. *J Biol Chem* 269: 14363–14366.
- MacDonald MJ (1981) High content of mitochondrial glycerol-3-phosphate dehydrogenase in pancreatic islets and its inhibition by diazoxide. *J Biol Chem* 256: 8287–8290.
- Koza RA, Kozak UC, Brown LJ, Leiter EH, MacDonald MJ, et al. (1996) Sequence and tissue-dependent RNA expression of mouse FAD-linked glycerol-3-phosphate dehydrogenase. *Arch Biochem Biophys* 336: 97–104.
- Hunt SM, Osnos M, Rivlin RS (1970) Thyroid hormone regulation of mitochondrial alpha-glycerophosphate dehydrogenase in liver and hepatoma. *Cancer Res* 30: 1764–1768.
- Dummler K, Muller S, Seitz HJ (1996) Regulation of adenine nucleotide translocase and glycerol 3-phosphate dehydrogenase expression by thyroid hormones in different rat tissues. *Biochem J* 317: 913–918.
- Weitzel JM, Kutz S, Radtke C, Grott S, Seitz HJ (2001) Hormonal regulation of multiple promoters of the rat mitochondrial glycerol-3-phosphate dehydrogenase gene: identification of a complex hormone-response element in the ubiquitous promoter B. *Eur J Biochem* 268: 4095–4103.
- Brown LJ, Koza RA, Everett C, Reitman ML, Marshall L, et al. (2002) Normal thyroid thermogenesis but reduced viability and adiposity in mice lacking the mitochondrial glycerol phosphate dehydrogenase. *J Biol Chem* 277: 32892–32898.
- Brown LJ, Koza RA, Marshall L, Kozak LP, MacDonald MJ (2002) Lethal hypoglycemic ketosis and glyceroluria in mice lacking both the mitochondrial and the cytosolic glycerol phosphate dehydrogenases. *J Biol Chem* 277: 32899–32904.
- Dawson AP, Thorne CJ (1969) Preparation and some properties of L-3-glycerophosphate dehydrogenase from pig brain mitochondria. *Biochem J* 111: 27–34.
- Donnellan JF, Barker MD, Wood J, Beechey RB (1970) Specificity and locale of the L-3-glycerophosphate-flavoprotein oxidoreductase of mitochondria isolated from the flight muscle of *Sarcophaga barbata thoms*. *Biochem J* 120: 467–478.
- Garrib A, McMurray WC (1986) Purification and characterization of glycerol-3-phosphate dehydrogenase (flavin-linked) from rat liver mitochondria. *J Biol Chem* 261: 8042–8048.
- Rauchova H, Drahota Z, Rauch P, Fato R, Lenaz G (2003) Coenzyme Q releases the inhibitory effect of free fatty acids on mitochondrial glycerophosphate dehydrogenase. *Acta Biochim Pol* 50: 405–413.
- Bukowiecki LJ, Lindberg O (1974) Control of *sn*-glycerol 3-phosphate oxidation in brown adipose tissue mitochondria by calcium and acyl-CoA. *Biochim Biophys Acta* 348: 115–125.
- Drahota Z, Saf P, Rauchová H, Kalous M (1995) Dicarbanonborates—new inhibitors of mitochondrial L-glycerol-3-phosphate dehydrogenase. *Biochem Biophys Res Commun* 210: 760–765.
- Cooney GJ, Dawson AG (1979) Effects of indomethacin on respiration and the  $\alpha$ -glycerophosphate shuttle in rat kidney mitochondria. *Biochem Pharmacol* 28: 1067–1070.
- Beleznai Z, Jancsik V (1989) Role of cardiolipin in the functioning of mitochondrial L-glycerol-3-phosphate dehydrogenase. *Biochem Biophys Res Commun* 159: 132–139.
- Grimmsmann T, Rustenbeck I (1998) Direct effects of diazoxide on mitochondria in pancreatic B-cells and on isolated liver mitochondria. *Br J Pharmacol* 123: 781–788.
- Maity P, Bindu S, Dey S, Goyal M, Alam A, et al. (2009) Indomethacin, a non-steroidal anti-inflammatory drug, develops gastropathy by inducing reactive oxygen species-mediated mitochondrial pathology and associated apoptosis in gastric mucosa: A novel role of mitochondrial aconitase oxidation. *J Biol Chem* 284: 3058–3068.
- Drahota Z, Mares V, Rauchová H, Saf P, Kalous M (1994) Inhibition of mitochondrial ATPase by dicarboxypolyborate, a new enzyme inhibitor. *J Bioenerg Biomembr* 26: 583–586.
- Schurr A, Payne RS (2000) NADH Shuttle and Insulin Secretion. *Science* 287: 931.
- Affourtit C, Quinlan CL, Brand MD (2012) Measurement of proton leak and electron leak in isolated mitochondria. *Methods Mol Biol* 810: 165–182.
- Choi SW, Gerencser AA, Nicholls DG (2009) Bioenergetic analysis of isolated cerebrocortical nerve terminals on a microgram scale: spare respiratory capacity and stochastic mitochondrial failure. *J Neurochem* 109: 1179–1191.
- Orr AL, Quinlan CL, Perevoshchikova IV, Brand MD (2012) A refined analysis of superoxide production by mitochondrial *sn*-glycerol 3-phosphate dehydrogenase. *J Biol Chem* 287: 42921–42935.
- Treberg JR, Quinlan CL, Brand MD (2010) Hydrogen peroxide efflux from muscle mitochondria underestimates matrix superoxide production—a correction using glutathione depletion. *FEBS J* 277: 2766–2778.
- Treberg JR, Quinlan CL, Brand MD (2011) Evidence for two sites of superoxide production by mitochondrial NADH-ubiquinone oxidoreductase (complex I). *J Biol Chem* 286: 27103–27110.
- Quinlan CL, Orr AL, Perevoshchikova IV, Treberg JR, Ackrell BA, et al. (2012) Mitochondrial complex II can generate reactive oxygen species at high rates in both the forward and reverse reactions. *J Biol Chem* 287: 27255–27264.
- Perevoshchikova IV, Quinlan CL, Orr AL, Gerencser AA, Brand MD (2013) Sites of superoxide and hydrogen peroxide production during fatty acid oxidation in rat skeletal muscle mitochondria. *Free Radic Biol Med* 61: 298–309.
- Quinlan CL, Gerencser AA, Treberg JR, Brand MD (2011) The mechanism of superoxide production by the antimycin-inhibited mitochondrial Q-cycle. *J Biol Chem* 286: 31361–31372.
- Lambert AJ, Buckingham JA, Boysen HM, Brand MD (2008) Diphenyleneiodonium acutely inhibits reactive oxygen species production by mitochondrial complex I during reverse, but not forward electron transport. *Biochim Biophys Acta* 1777: 397–403.
- Ward MW, Rego AC, Frenguelli BG, Nicholls DG (2000) Mitochondrial membrane potential and glutamate excitotoxicity in cultured cerebellar granule cells. *J Neurosci* 20: 7208–7219.
- Brideau C, Gunter B, Pikounis B, Liaw A (2003) Improved statistical methods for hit selection in high-throughput screening. *J Biomol Screen* 8: 634–647.
- Malo N, Hanley JA, Cerquozzi S, Pelletier J, Nadon R (2006) Statistical practice in high-throughput screening data analysis. *Nat Biotech* 24: 167–175.
- Cornish-Bowden A (1999) Fundamentals of Enzyme Kinetics. London: Portland Press.
- Dawson AP, Thorne CJ (1975) L-3-glycerophosphate dehydrogenase from pig brain mitochondria. *Methods Enzymol* 41: 254–259.
- Schryvers A, Lohmeier E, Weiner JH (1978) Chemical and functional properties of the native and reconstituted forms of the membrane-bound, aerobic glycerol-3-phosphate dehydrogenase of *Escherichia coli*. *J Biol Chem* 253: 783–788.
- Rogers GW, Brand MD, Petrosyan S, Ashok D, Elorza AA, et al. (2011) High throughput microplate respiratory measurements using minimal quantities of isolated mitochondria. *PLoS ONE* 6: e21746.
- Choi SW, Gerencser AA, Lee DW, Rajagopalan S, Nicholls DG, et al. (2011) Intrinsic bioenergetic properties and stress sensitivity of dopaminergic synaptosomes. *J Neurosci* 31: 4524–4534.
- Trettel F, Rigamonti D, Hilditch-Maguire P, Wheeler VC, Sharp AH, et al. (2000) Dominant phenotypes produced by the HD mutation in STHdh(Q111) striatal cells. *Hum Mol Genet* 9: 2799–2809.
- Orr AL, Ashok D, Sarantos MR, Shi T, Hughes RE, et al. (2013) Inhibitors of ROS production by the ubiquinone-binding site of mitochondrial complex I identified by chemical screening. *Free Radic Biol Med* 65: 1047–1059.
- Lambert AJ, Brand MD (2004) Superoxide production by NADH:ubiquinone oxidoreductase (complex I) depends on the pH gradient across the mitochondrial inner membrane. *Biochem J* 382: 511–517.

(XLSX)

## Author Contributions

Conceived and designed the experiments: ALO REH MDB. Performed the experiments: ALO DA MRS RN AG. Analyzed the data: ALO. Contributed reagents/materials/analysis tools: MRS TS REH. Wrote the paper: ALO MDB.



45. Nguyen NH, Bråthe A, Hassel B (2003) Neuronal uptake and metabolism of glycerol and the neuronal expression of mitochondrial glycerol-3-phosphate dehydrogenase. *J Neurochem* 85: 831–842.
46. Tretter L, Takacs K, Kövér K, Adam-Vizi V (2007) Stimulation of H<sub>2</sub>O<sub>2</sub> generation by calcium in brain mitochondria respiring on alpha-glycerophosphate. *J Neurosci Res* 85: 3471–3479.
47. Kauppinen RA, Sihra TS, Nicholls DG (1987) Aminoxyacetic acid inhibits the malate-aspartate shuttle in isolated nerve terminals and prevents the mitochondria from utilizing glycolytic substrates. *Biochim Biophys Acta* 930: 173–178.
48. Saheki T, Iijima M, Li MX, Kobayashi K, Horiuchi M, et al. (2007) Citrin/Mitochondrial glycerol-3-phosphate dehydrogenase double knock-out mice recapitulate features of human citrin deficiency. *J Biol Chem* 282: 25041–25052.
49. Eto K, Tsubamoto Y, Terauchi Y, Sugiyama T, Kishimoto T, et al. (1999) Role of NADH shuttle system in glucose-induced activation of mitochondrial metabolism and insulin secretion. *Science* 283: 981–985.
50. DosSantos RA, Alfadda A, Eto K, Kadowaki T, Silva JE (2003) Evidence for a compensated thermogenic defect in transgenic mice lacking the mitochondrial glycerol-3-phosphate dehydrogenase gene. *Endocrinology* 144: 5469–5479.
